# Supplementary material for: Polymerization of α-olefins and their copolymerization with ethylene by half-sandwich scandium catalysts with an N-heterocyclic carbene ligand
Source: Royal Society of Chemistry journal article supplement (doi:10.1039/d2py01526a), 2023-01-01
Supplement: d2py01526a1.pdf [file d2py01526a1.pdf]

## Electronic Supplementary Information

### Polymerization of $\alpha$ -olefins and their copolymerization with ethylene by half-sandwich scandium catalysts with an *N*-heterocyclic carbene ligand

Yinran Wang,<sup>a</sup> Lin Huang,<sup>b,c</sup> Zhaomin Hou<sup>\*a,b,c</sup> and Fang Guo<sup>\*a</sup>

<sup>a</sup> State Key Laboratory of Fine Chemicals, Department of Polymer Science and Engineering, School of Chemical Engineering, Dalian University of Technology, Dalian 116012, China. E-mail: guofang@dlut.edu.cn

<sup>b</sup> Organometallic Chemistry Laboratory, RIKEN Cluster for Pioneering Research, 2-1 Hirosawa, Wako, Saitama 351-0198, Japan. E-mail: houz@riken.jp

<sup>c</sup> Advanced Catalysis Research Group, RIKEN Center for Sustainable Resource Science, 2-1 Hirosawa, Wako, Saitama 351-0198, Japan.

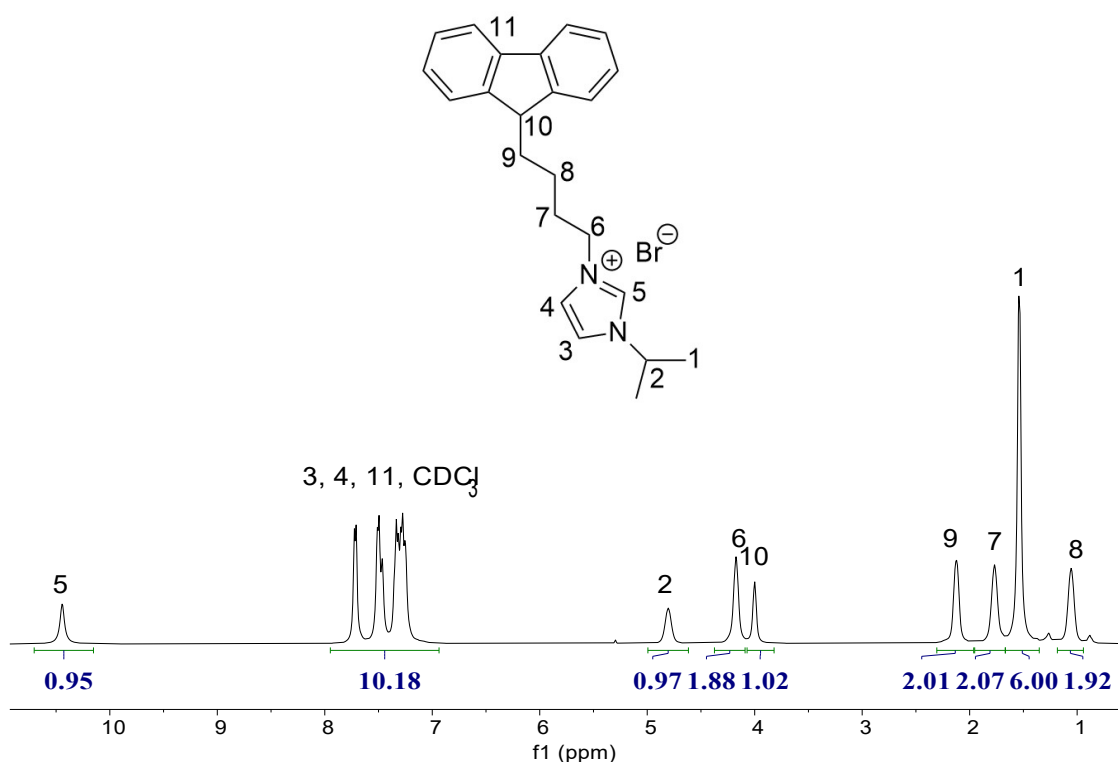

Fig. S1 <sup>1</sup>H-NMR spectrum of {Fluorenyl-H-(CH<sub>2</sub>)<sub>4</sub>-NHC-H}Br.

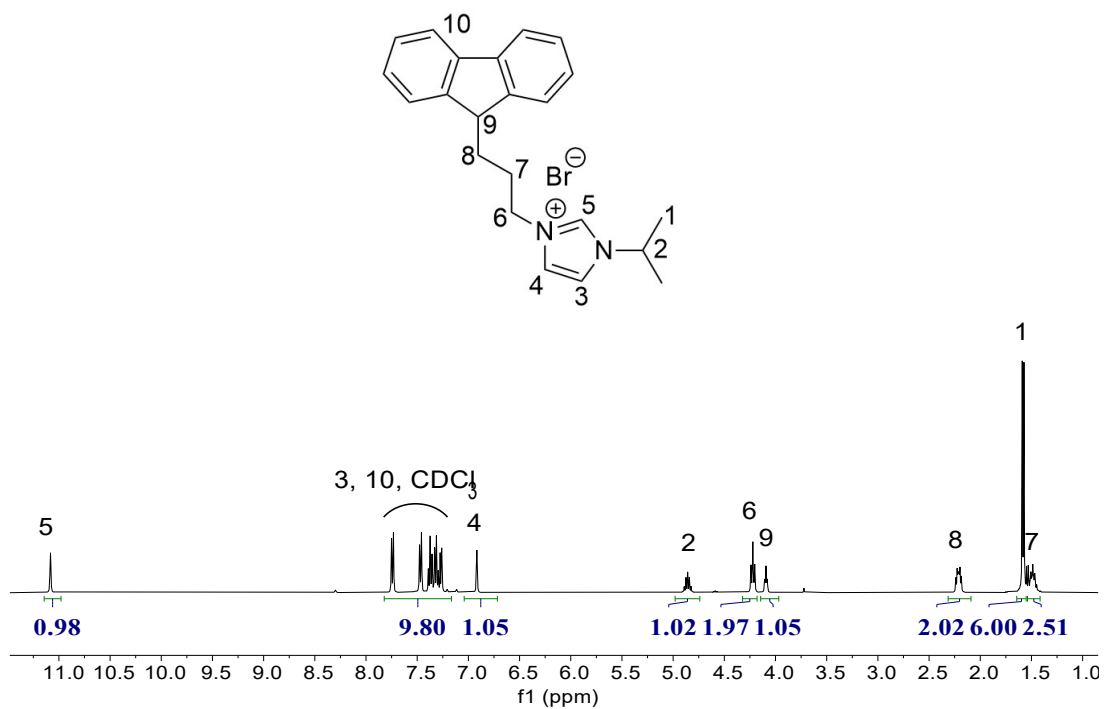

Fig. S2 <sup>1</sup>H-NMR spectrum of {Fluorenyl-H-(CH<sub>2</sub>)<sub>3</sub>-NHC-H}Br.

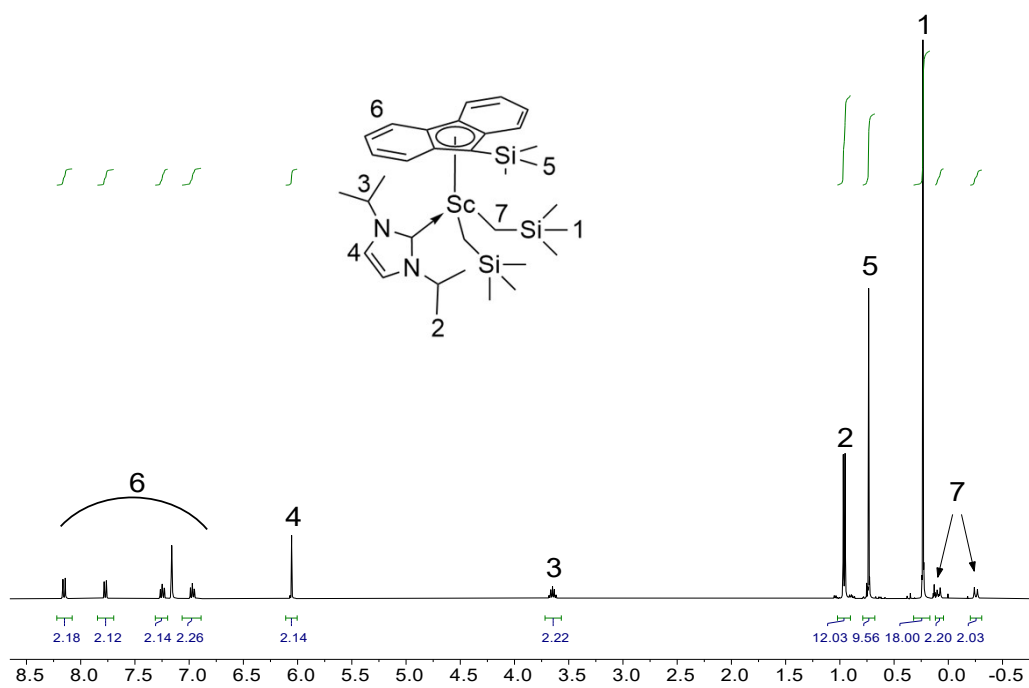

Fig. S3 <sup>1</sup>H-NMR spectrum of scandium complex 2.

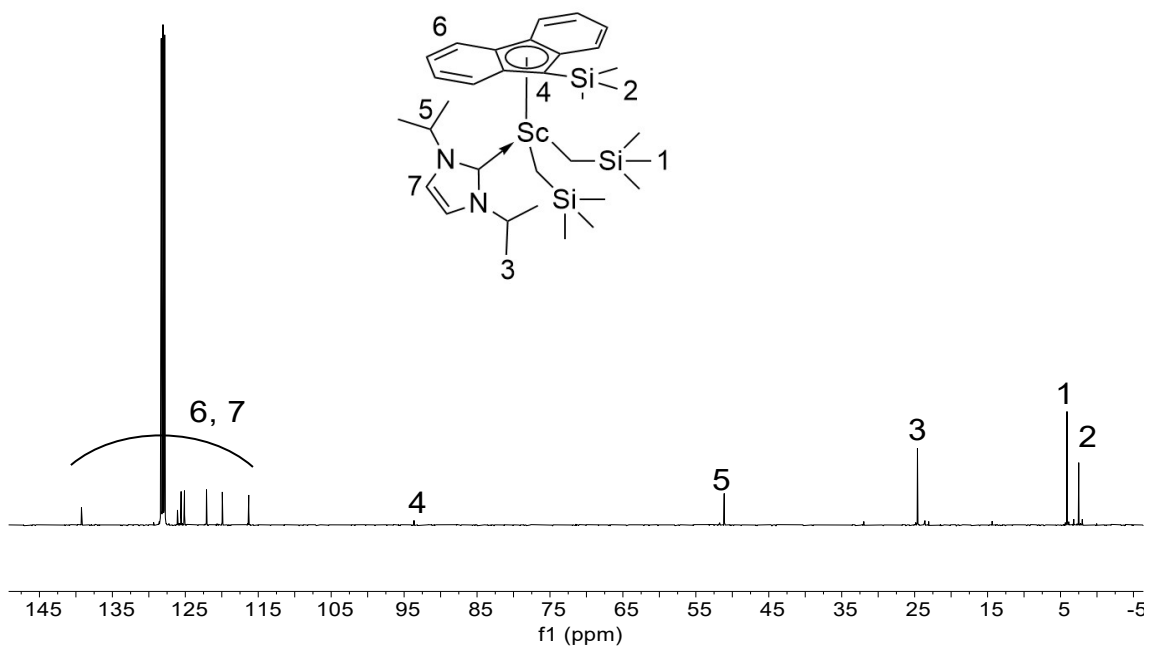

Fig. S4  $^{13}\text{C}$ -NMR spectrum of scandium complex 2.

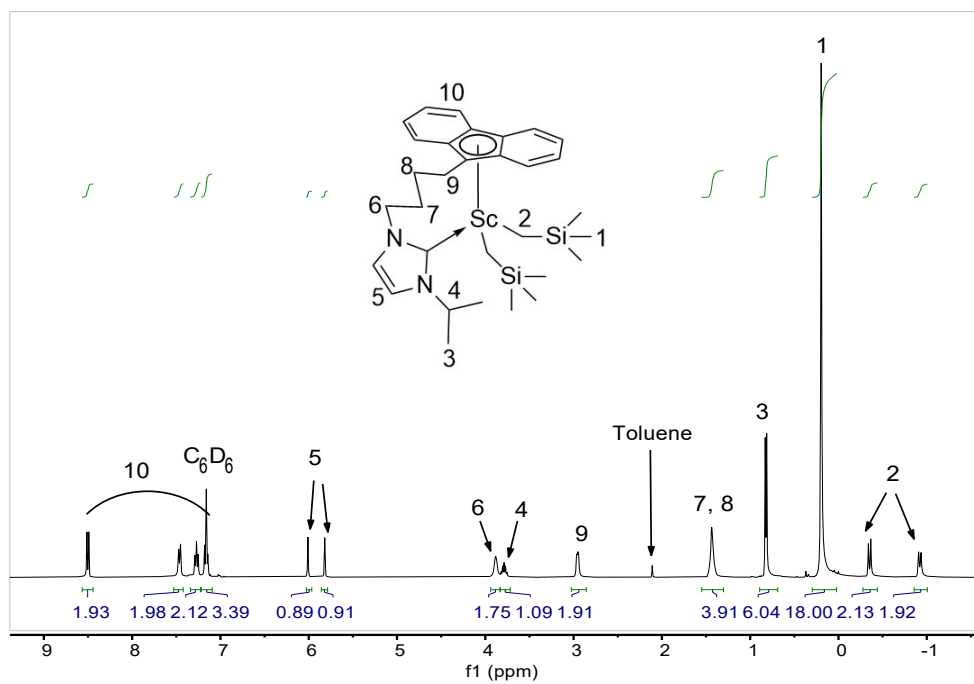

Fig. S5.  $^1\text{H}$ -NMR spectrum of scandium complex 3a.

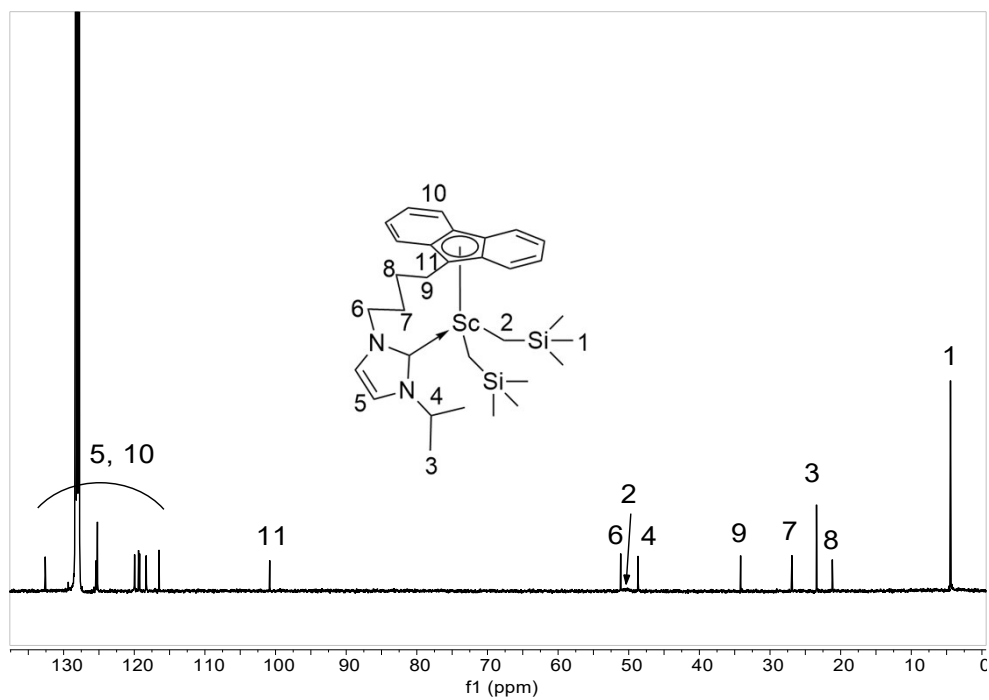

**Fig. S6**  $^{13}\text{C}$ -NMR spectrum of scandium complex **3a**.

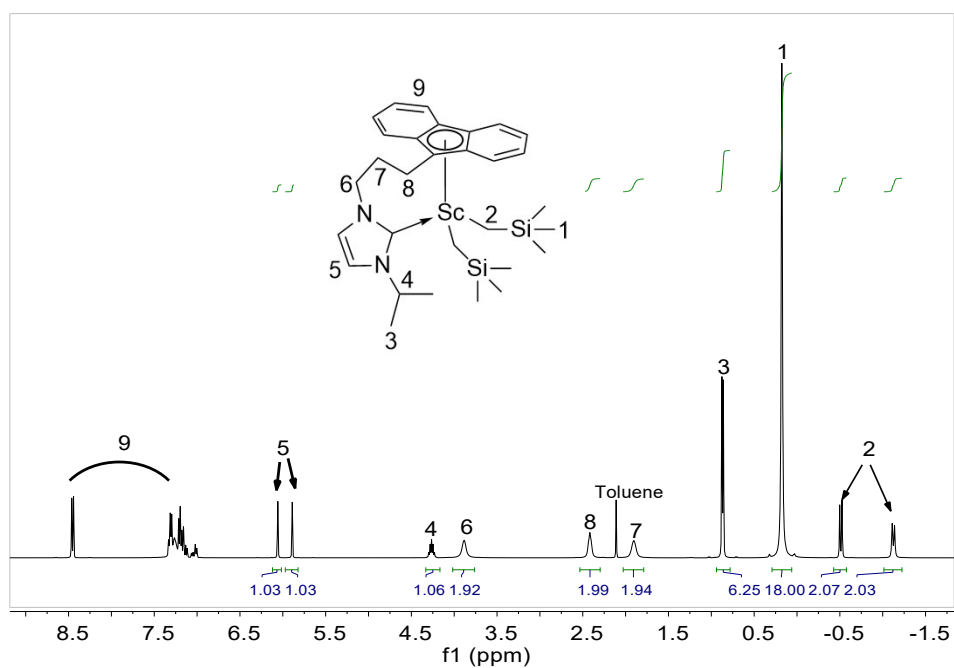

**Fig. S7**  $^1\text{H}$ -NMR spectrum of scandium complex **3b**.

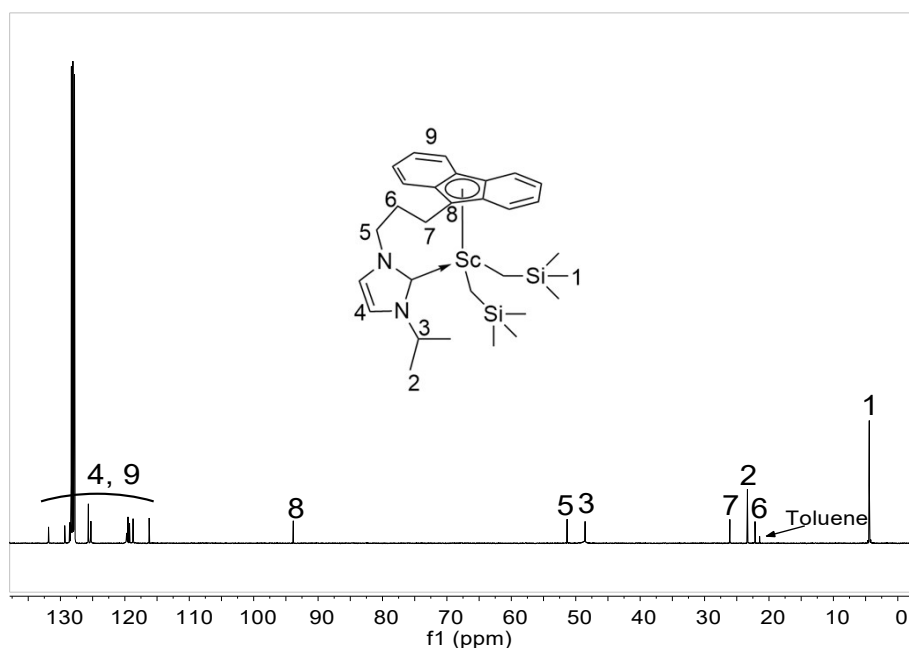

**Fig. S8**  $^{13}\text{C}$ -NMR spectrum of scandium complex **3b**.

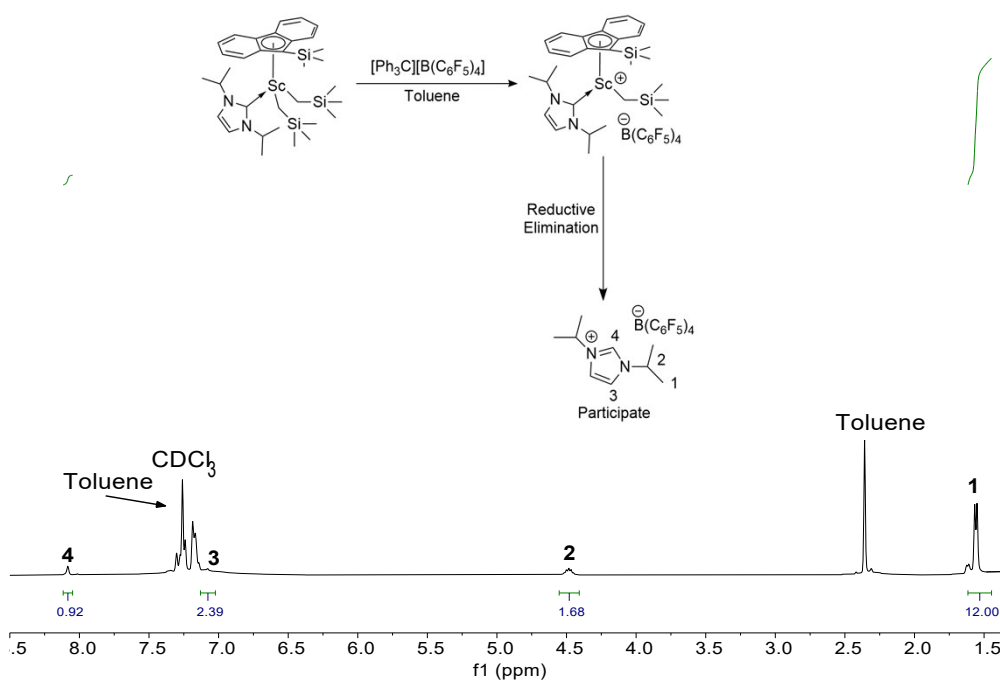

**Fig. S9**  $^1\text{H}$ -NMR spectrum of the precipitate. (In a glovebox, 5 mL toluene solution of  $[\text{Ph}_3\text{C}][\text{B}(\text{C}_6\text{F}_5)_4]$  (46.1mg,  $50\mu\text{mol}$ ) was added to 10mL toluene solution of **2** (30.5mg,  $50\mu\text{mol}$ ) at room temperature and stirred for 1h. The participate was filtered and washed by toluene and 1-hexene. Then the participate was dried and dissolved in  $\text{CDCl}_3$  for  $^1\text{H}$ -NMR analysis.  $^1\text{H}$ -NMR spectrum referred to: J. M. Farrell, J. A. Hatnean and D. W. Stephan, *J. Am. Chem. Soc.* 2012, **134**, 15728–15731.)

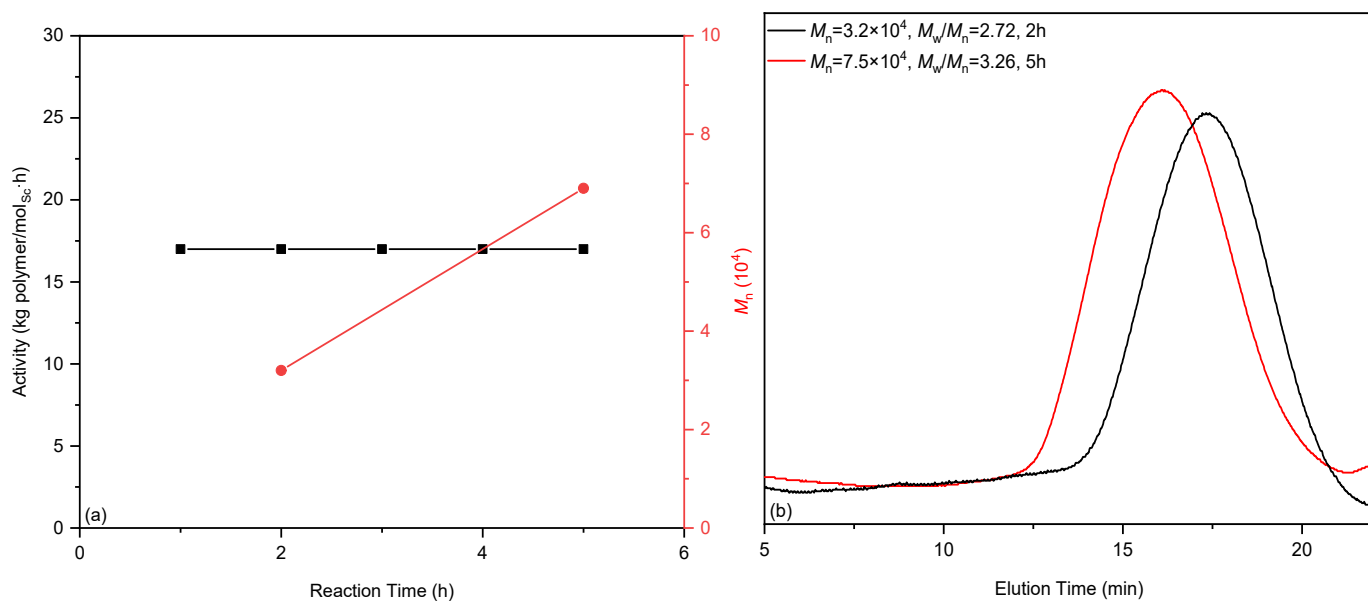

**Fig. S10** Polymerization activity and molecular weight of polymer products before the 3rd addition and after the final reaction. (In a glovebox, 2 mmol 1-hexene was added to 12 mL toluene solution of **3b** (5.3 mg, 10  $\mu$ mol) and  $[\text{Ph}_3\text{C}][\text{B}(\text{C}_6\text{F}_5)_4]$  (9.2 mg, 10  $\mu$ mol) every 1 h for a total of five additions. The resulting mixture was poured into a large amount of methanol to precipitate the polymer product before the 3rd addition and after the final reaction.)

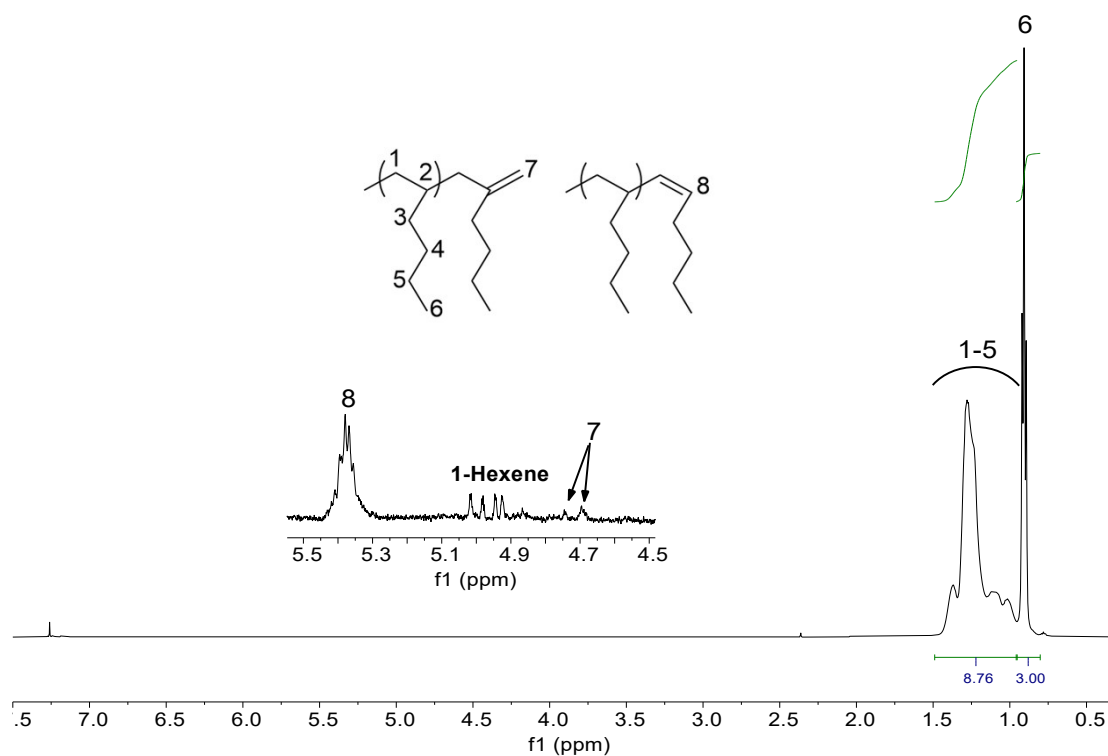

**Fig. S11** <sup>1</sup>H-NMR spectrum of a 1-hexene homopolymer prepared by **3c** at 25 °C.

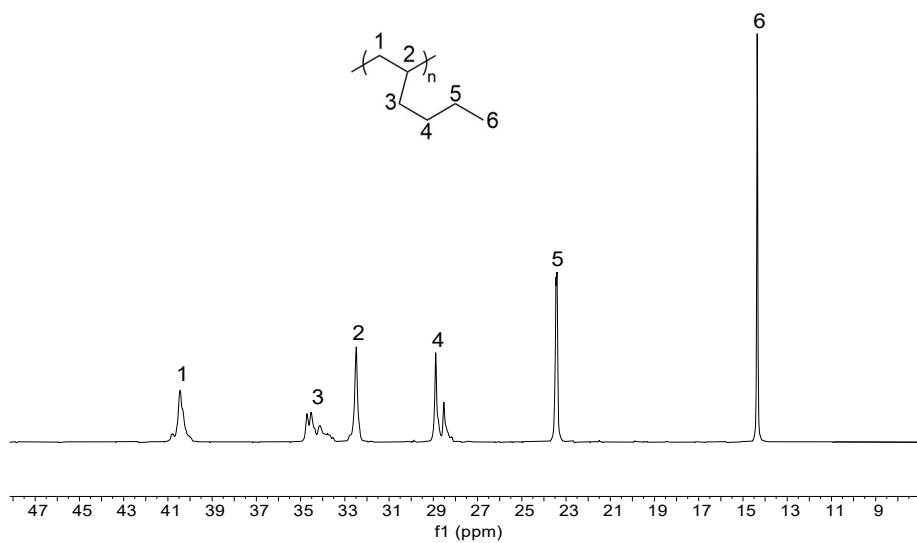

**Fig. S12**  $^{13}\text{C}$ -NMR spectrum of a 1-hexene homopolymer prepared by complex **3b** at 25 °C.

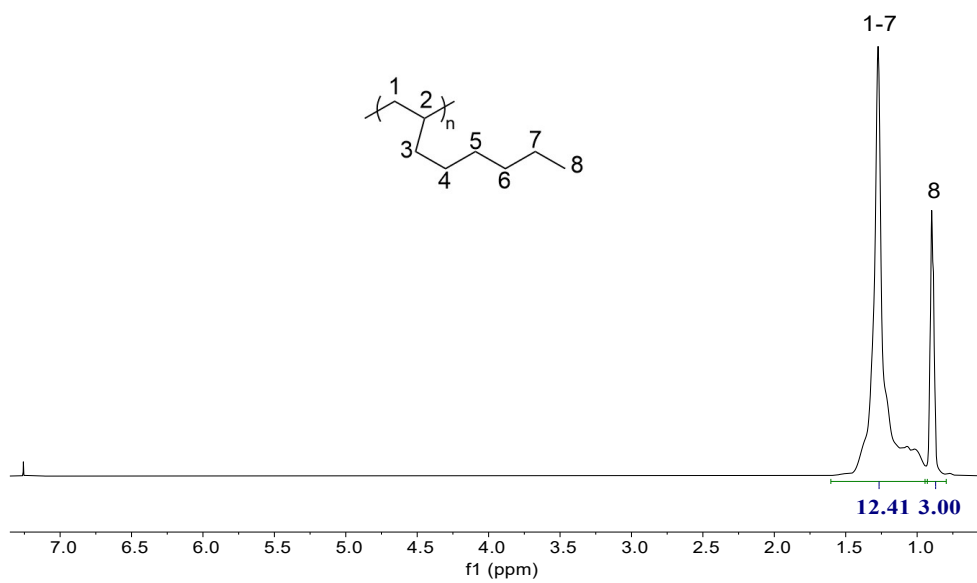

**Fig. S13**  $^1\text{H}$ -NMR spectrum of a 1-octene homopolymer prepared by **3b** at 25 °C.

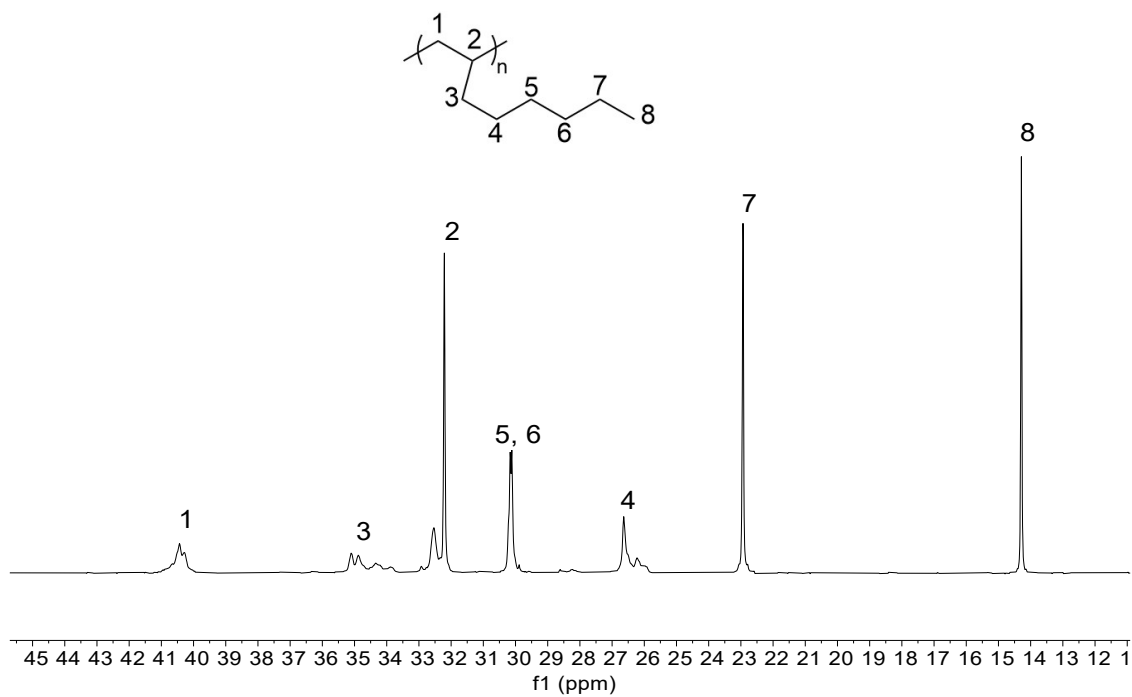

**Fig. S14**  $^{13}\text{C}$ -NMR spectrum of a 1-octene homopolymer prepared by **3b** at 25 °C.

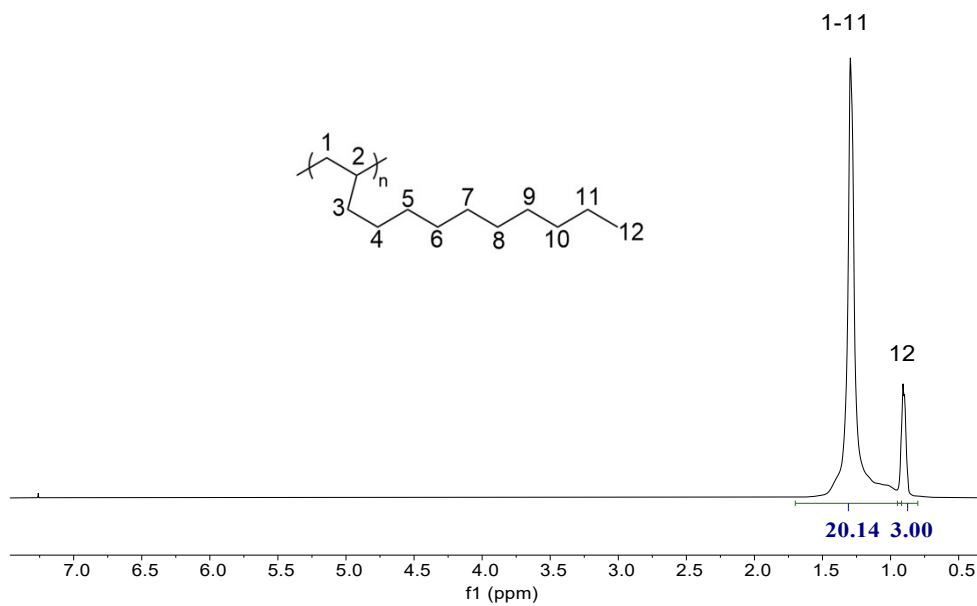

**Fig. S15**  $^1\text{H}$ -NMR spectrum of a 1-dodecene homopolymer prepared by **3b** at 25 °C.



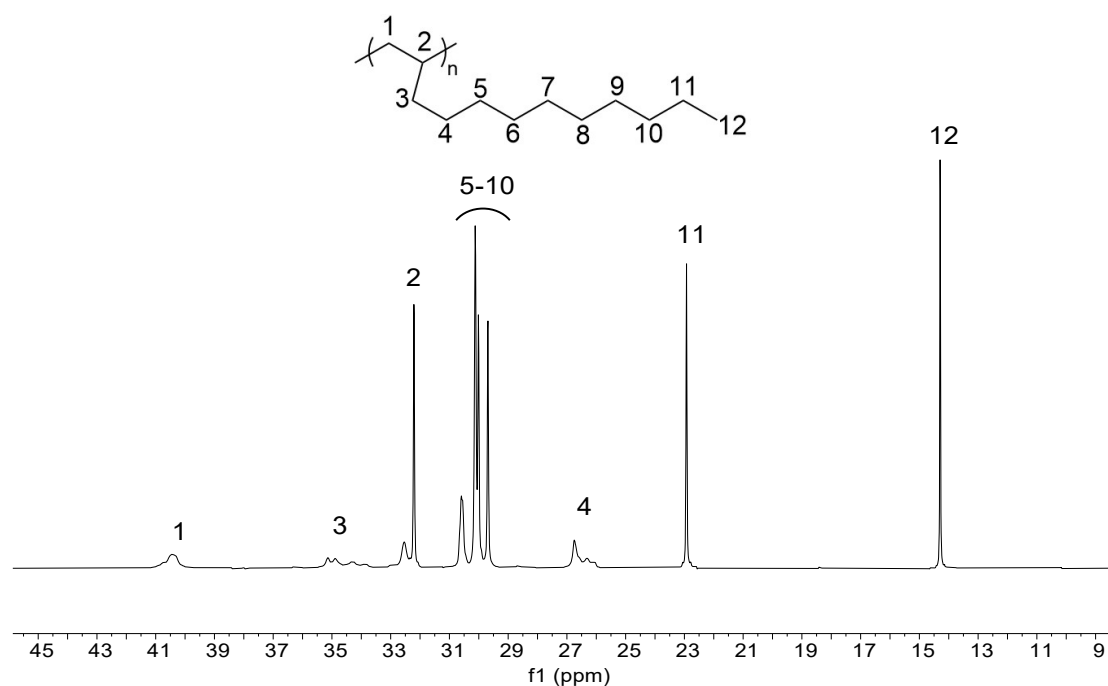

Fig. S16  $^{13}\text{C}$ -NMR spectrum of a 1-dodecene homopolymer prepared by complex **3b** at 25 °C.

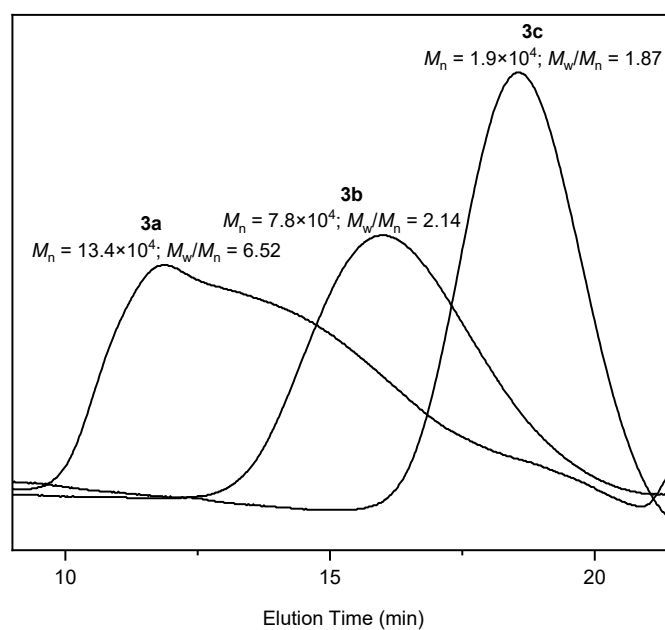

Fig. S17 GPC curves of 1-hexene homopolymers prepared by complexes **3a**, **3b** and **3c** at 25 °C.

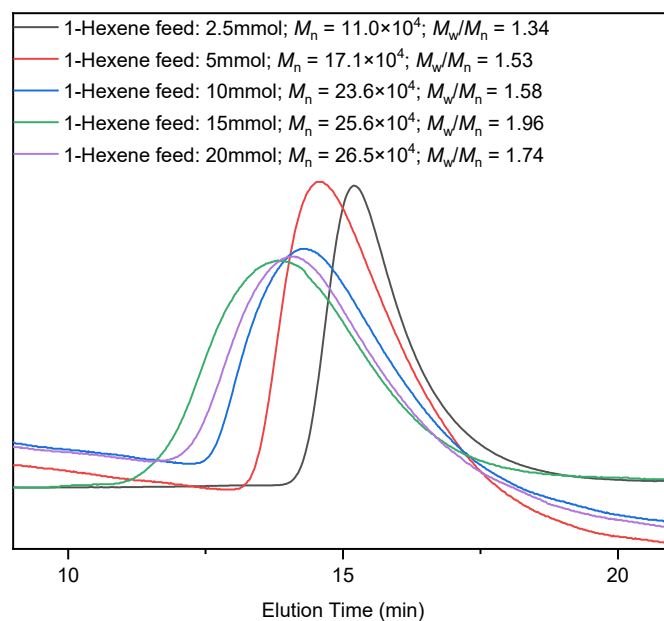

**Fig. S18** GPC curves of 1-hexene homopolymers prepared by **1** at -30 °C.

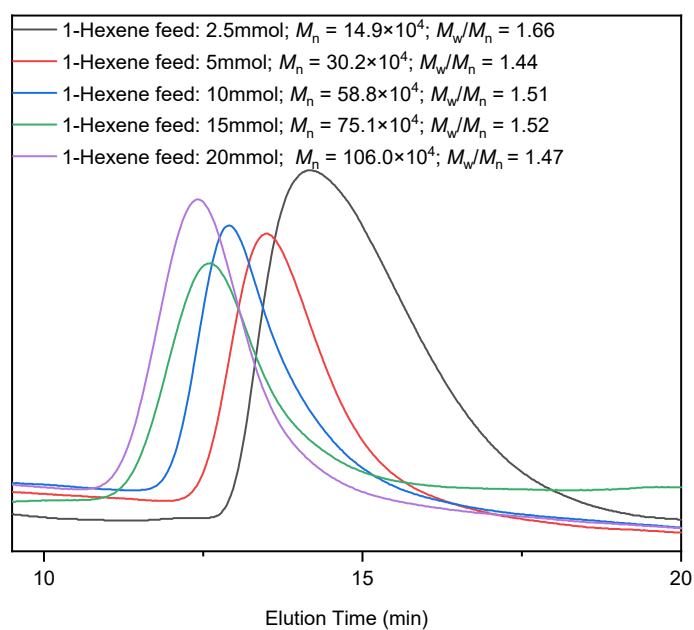

**Fig. S19** GPC curves of 1-hexene homopolymers prepared by **2** at -30 °C.

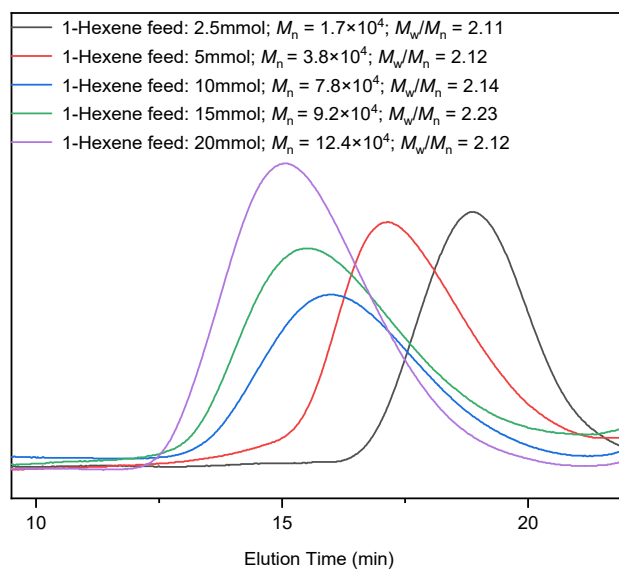

**Fig. S20** GPC curves of 1-hexene homopolymers prepared by **3b** at 25 °C.

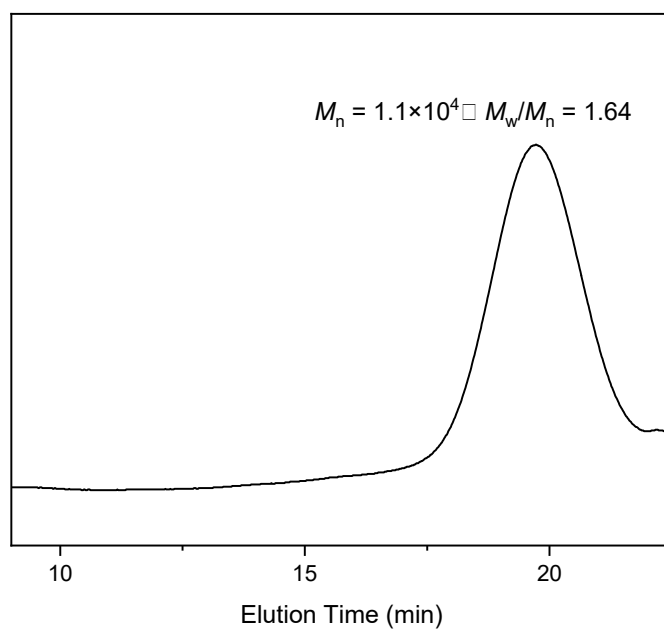

**Fig. S21** GPC curves of 1-hexene homopolymers prepared by **3b** at 80 °C.

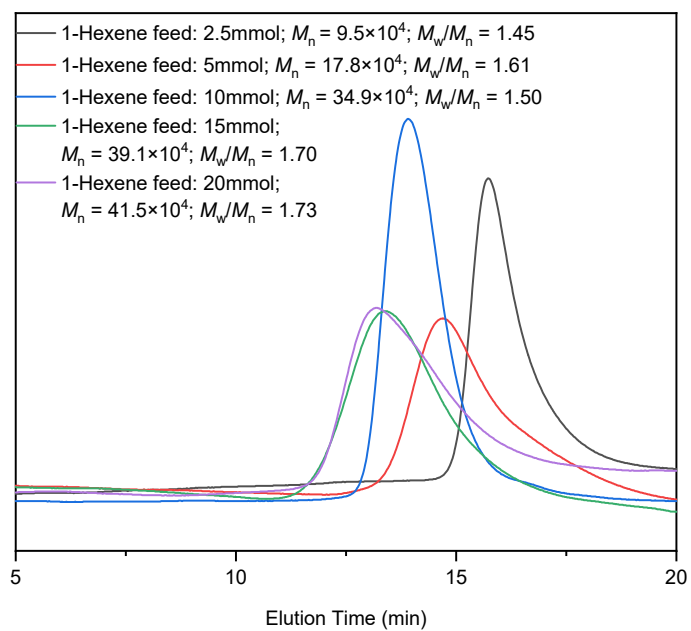

**Fig. S22** GPC curves of 1-hexene homopolymers prepared by **3b** at  $-30$  °C.

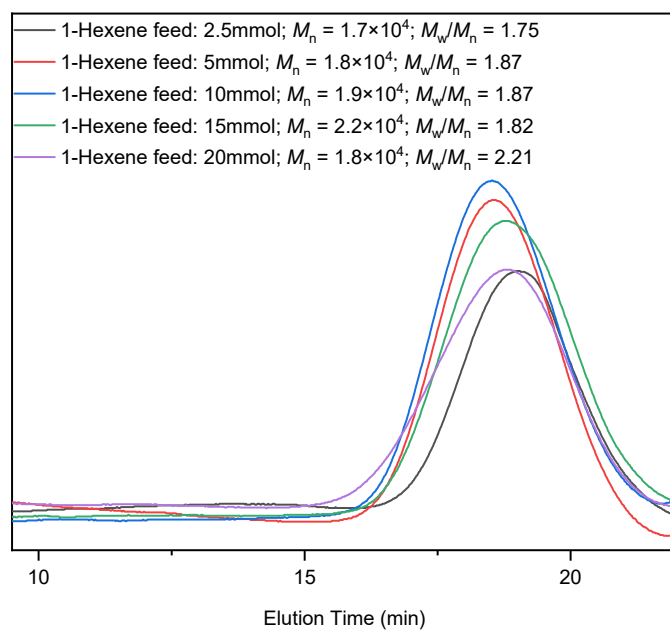

**Fig. S23** GPC curves of 1-hexene homopolymers prepared by **3a** at  $25$  °C.

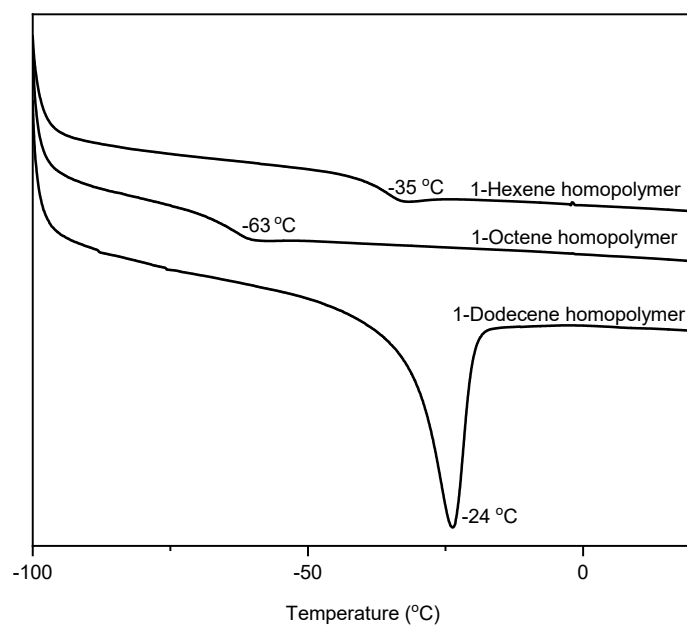

**Fig. S24** DSC curves of 1-hexene, 1-octene and 1-dodecene homopolymers prepared by **3b**.

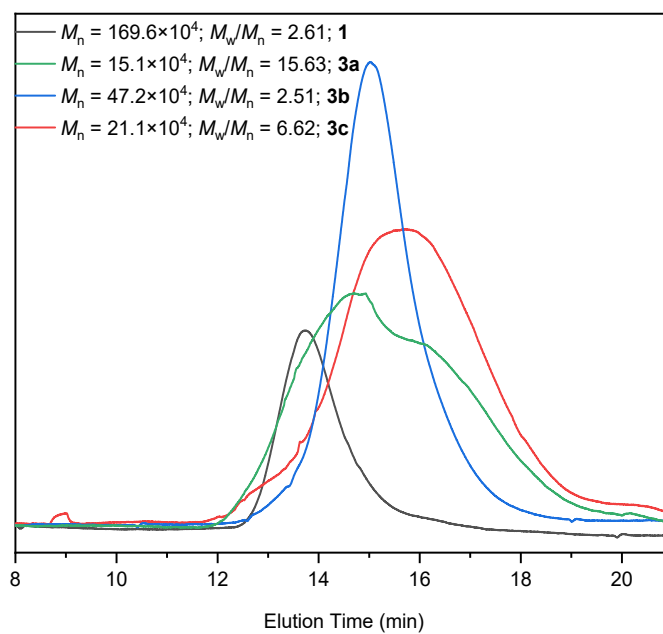

**Fig. S25** GPC curves of ethylene homopolymers prepared by **1**, **3a**, **3b** and **3c**.

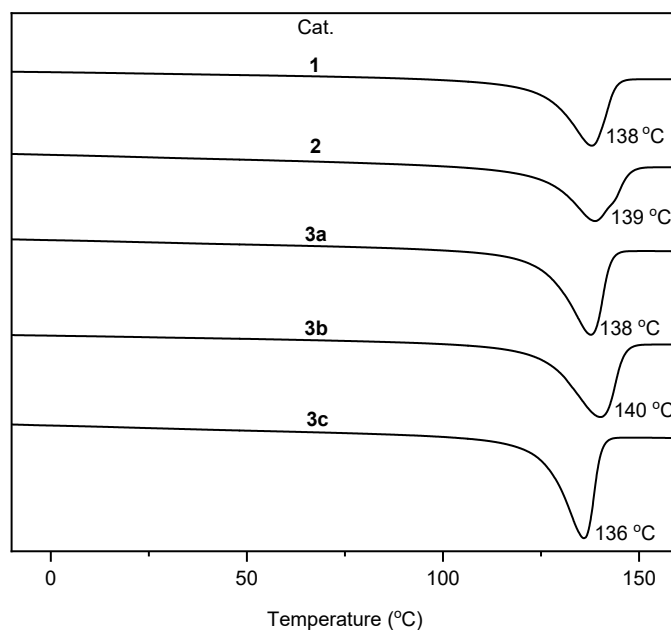

**Fig. S26** DSC curves of ethylene homopolymers prepared by **1**, **2**, **3a**, **3b** and **3c**.

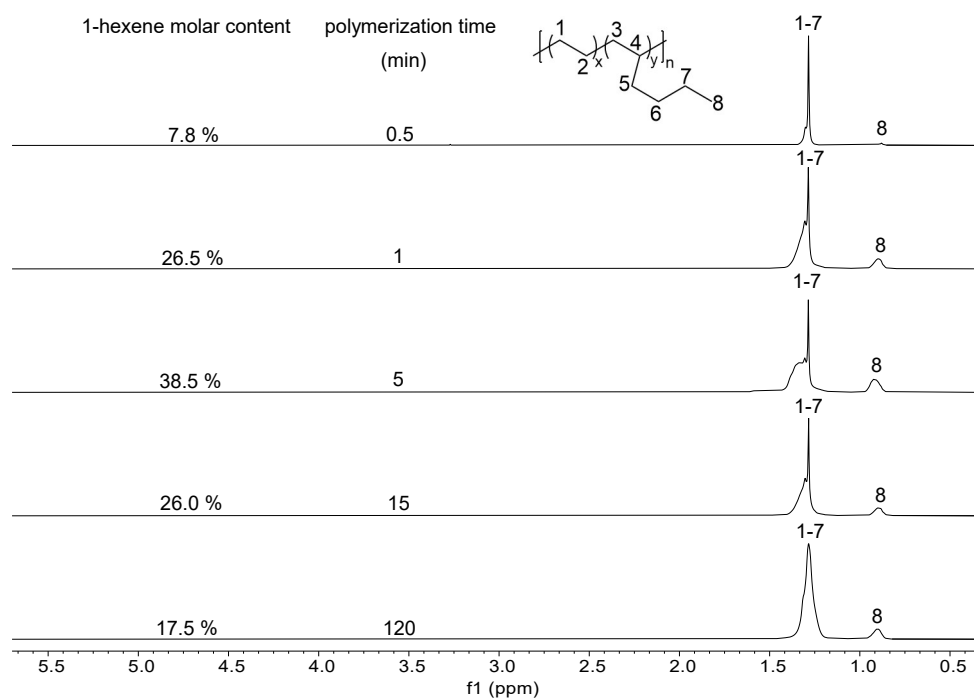

**Fig. S27**  $^1\text{H-NMR}$  spectra of 1-hexene-ethylene copolymers prepared by **3b** with different polymerization time.

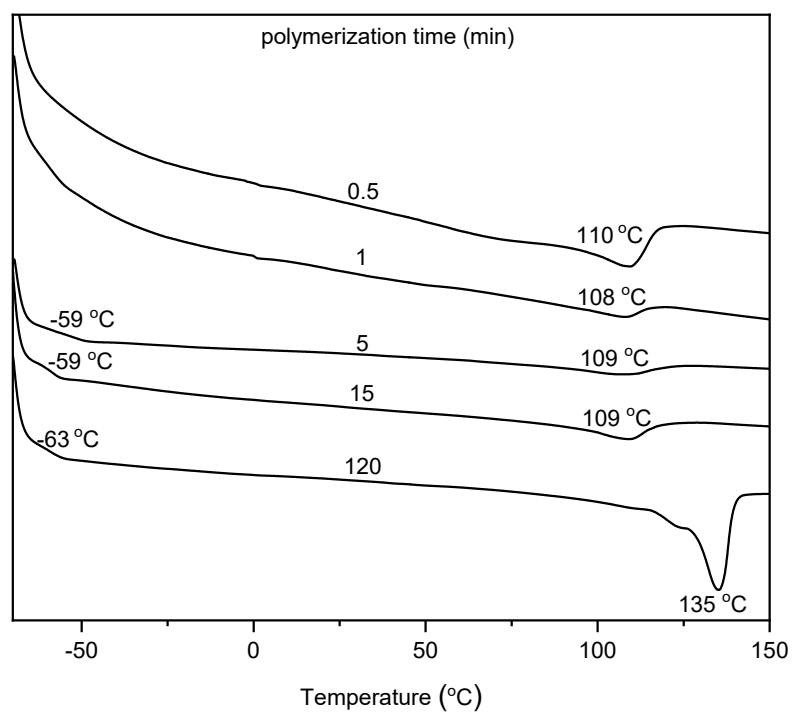

**Fig. S28** DSC curves of 1-hexene-ethylene copolymers prepared by **3b** with different polymerization time.

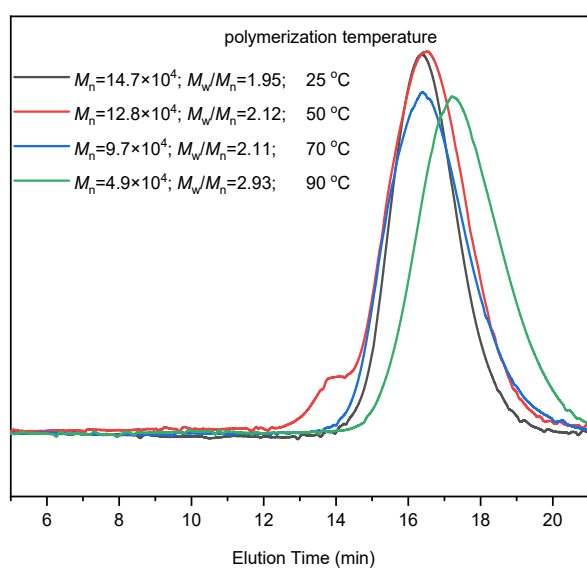

**Fig. S29** GPC curves of 1-hexene-ethylene copolymers prepared by **3b** at different temperature.

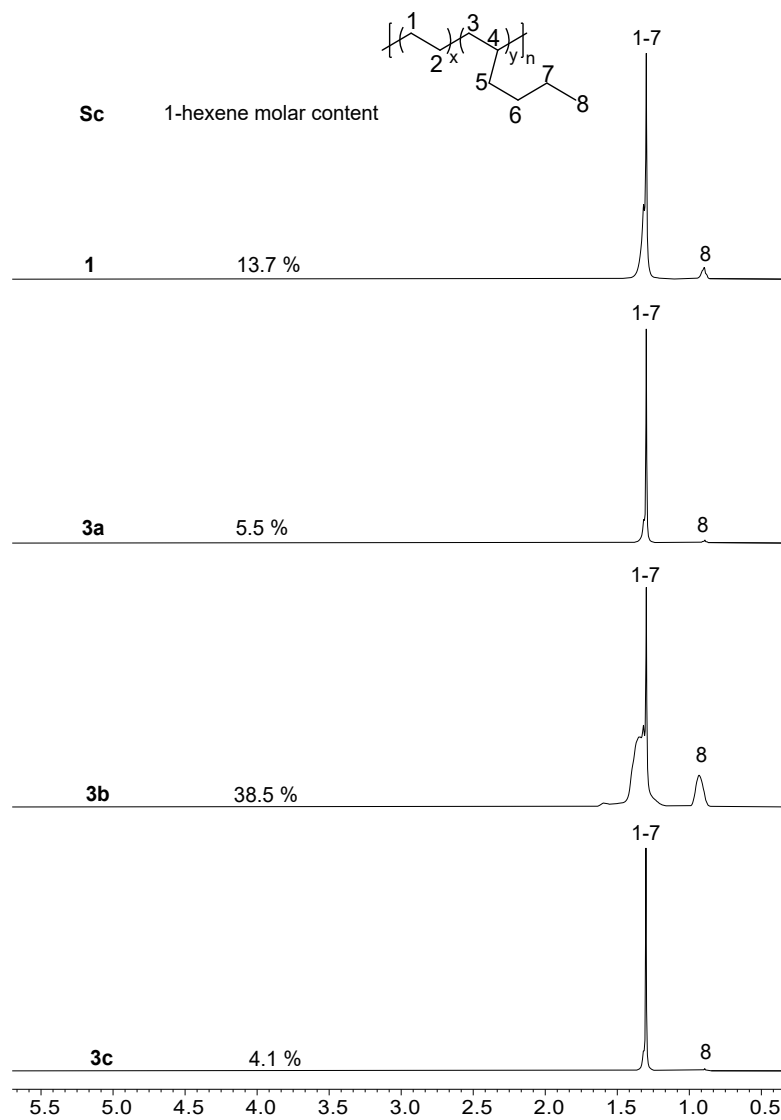

**Fig. S30**  $^1\text{H}$ -NMR spectra of 1-hexene-ethylene copolymers prepared by complex **1**, **3a**, **3b** and **3c**.



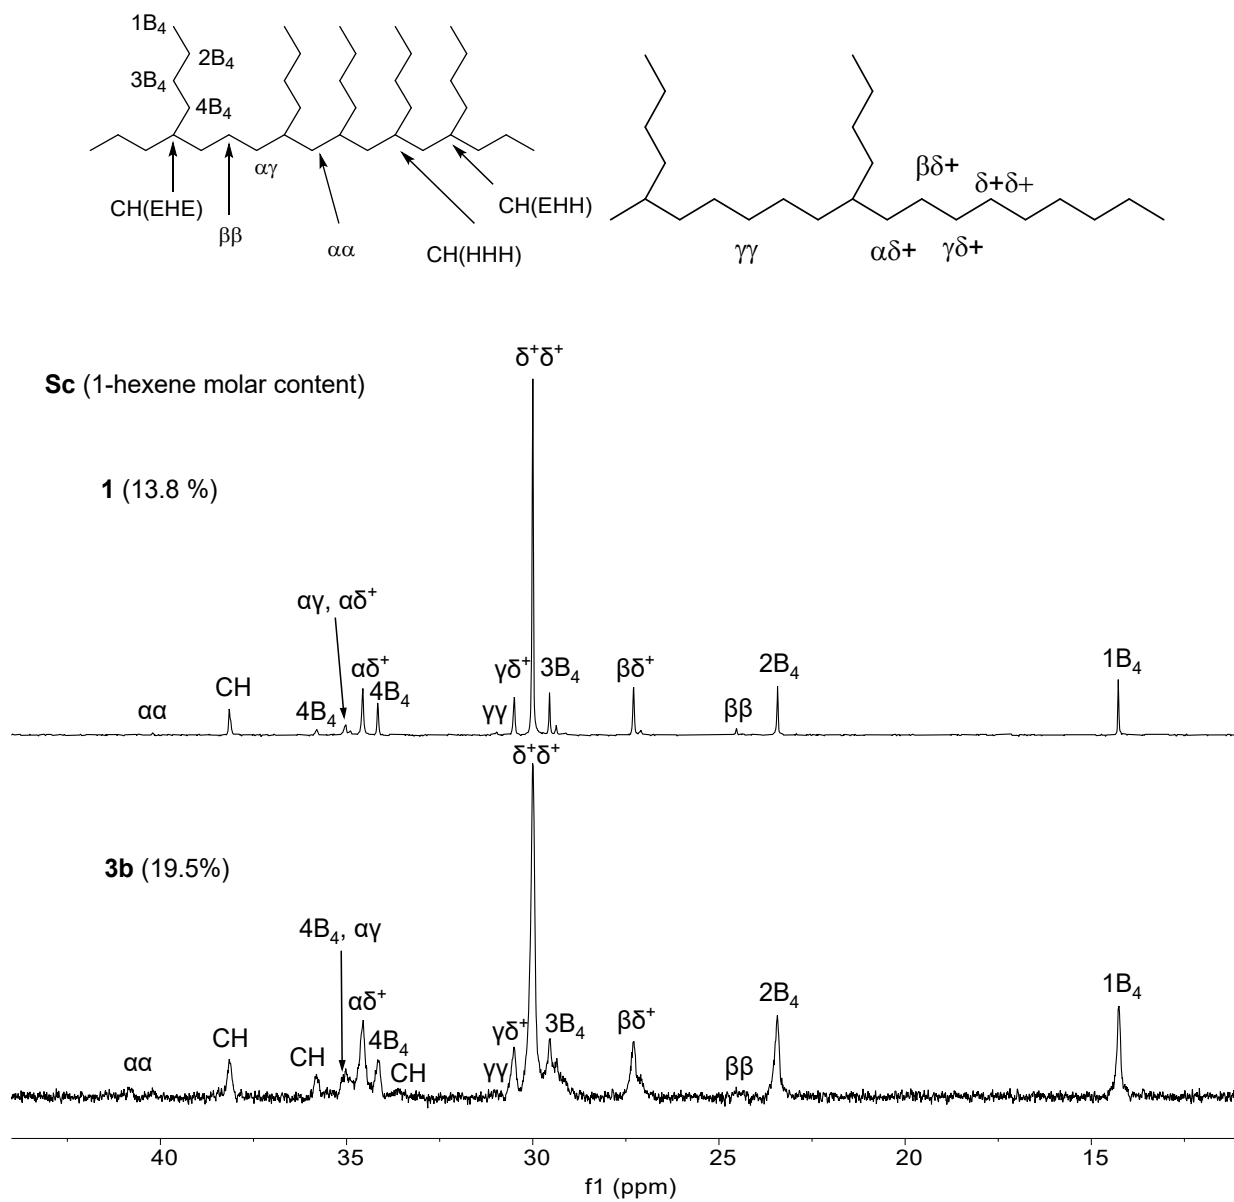

**Fig. S31**  $^{13}\text{C}$ -NMR spectra of 1-hexene-ethylene copolymers prepared by **1** and **3b**.

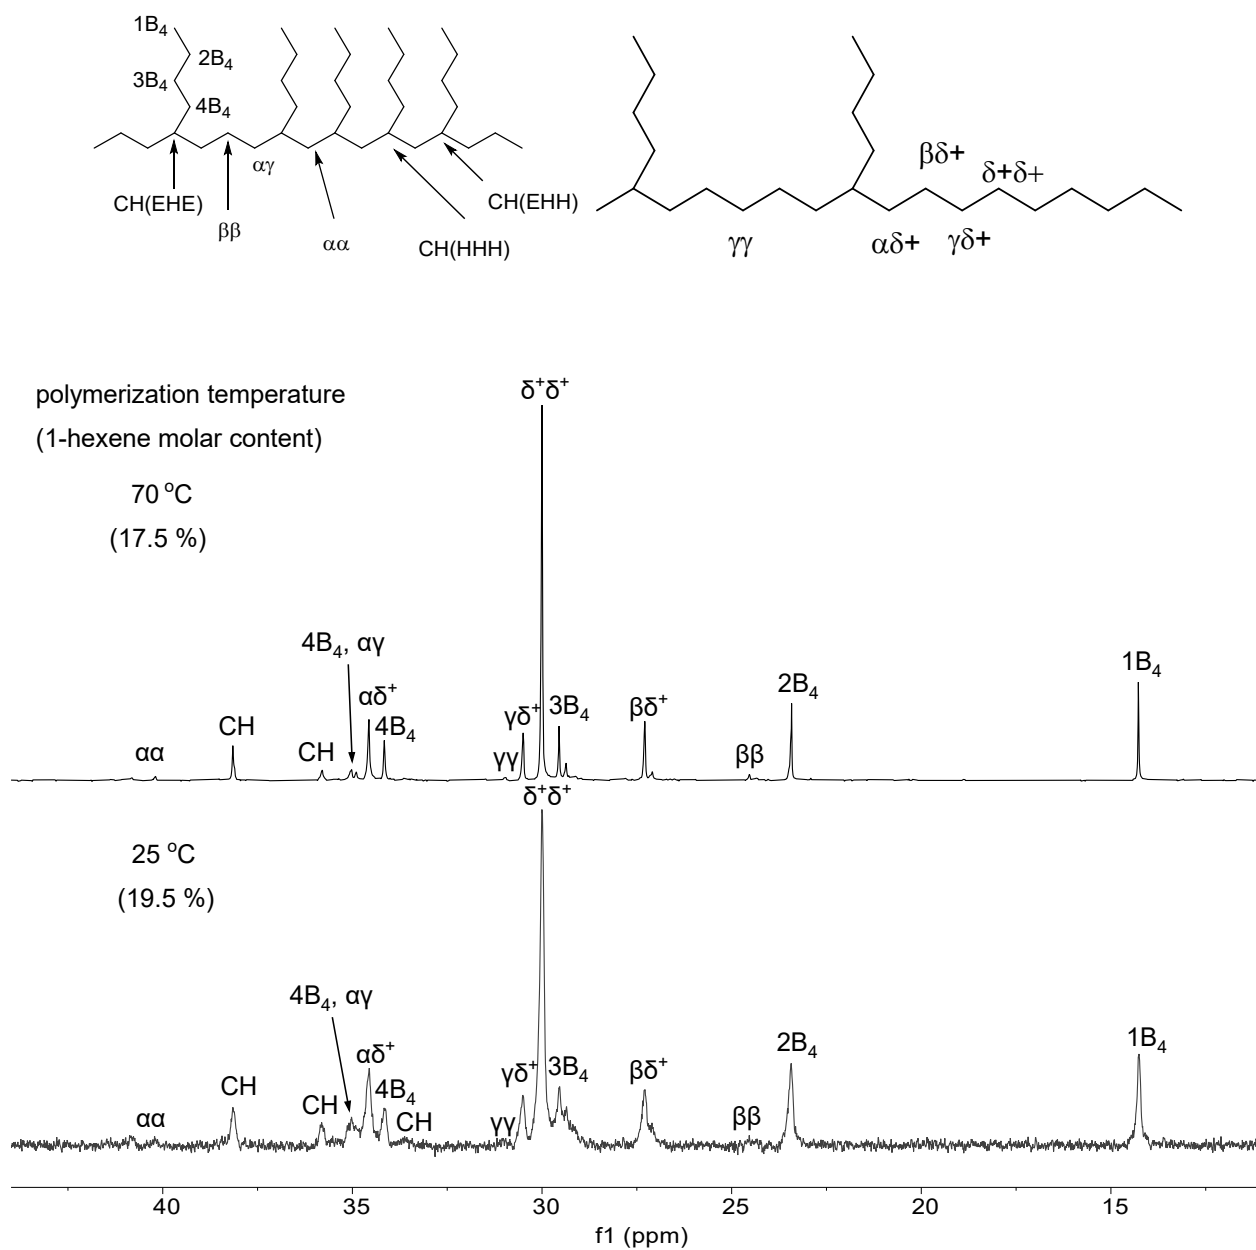

**Fig. S32**  $^{13}C$ -NMR spectra of 1-hexene-ethylene copolymers prepared by **3b** at different temperature.

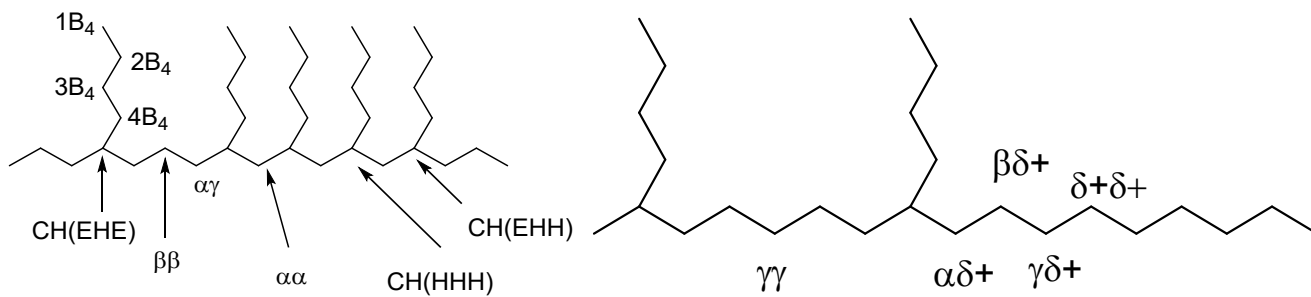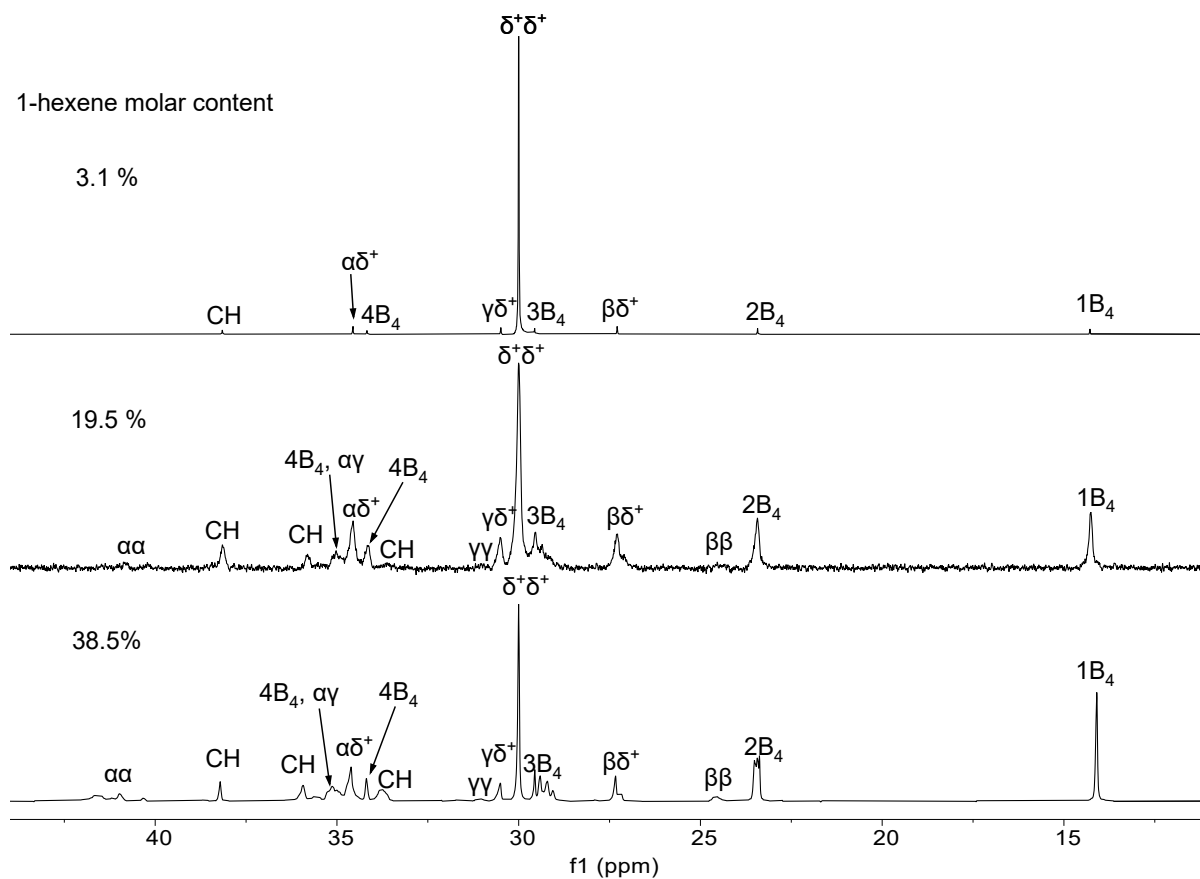

Fig. S33  $^{13}C$ -NMR spectra of 1-hexene-ethylene copolymers prepared by **3b**.

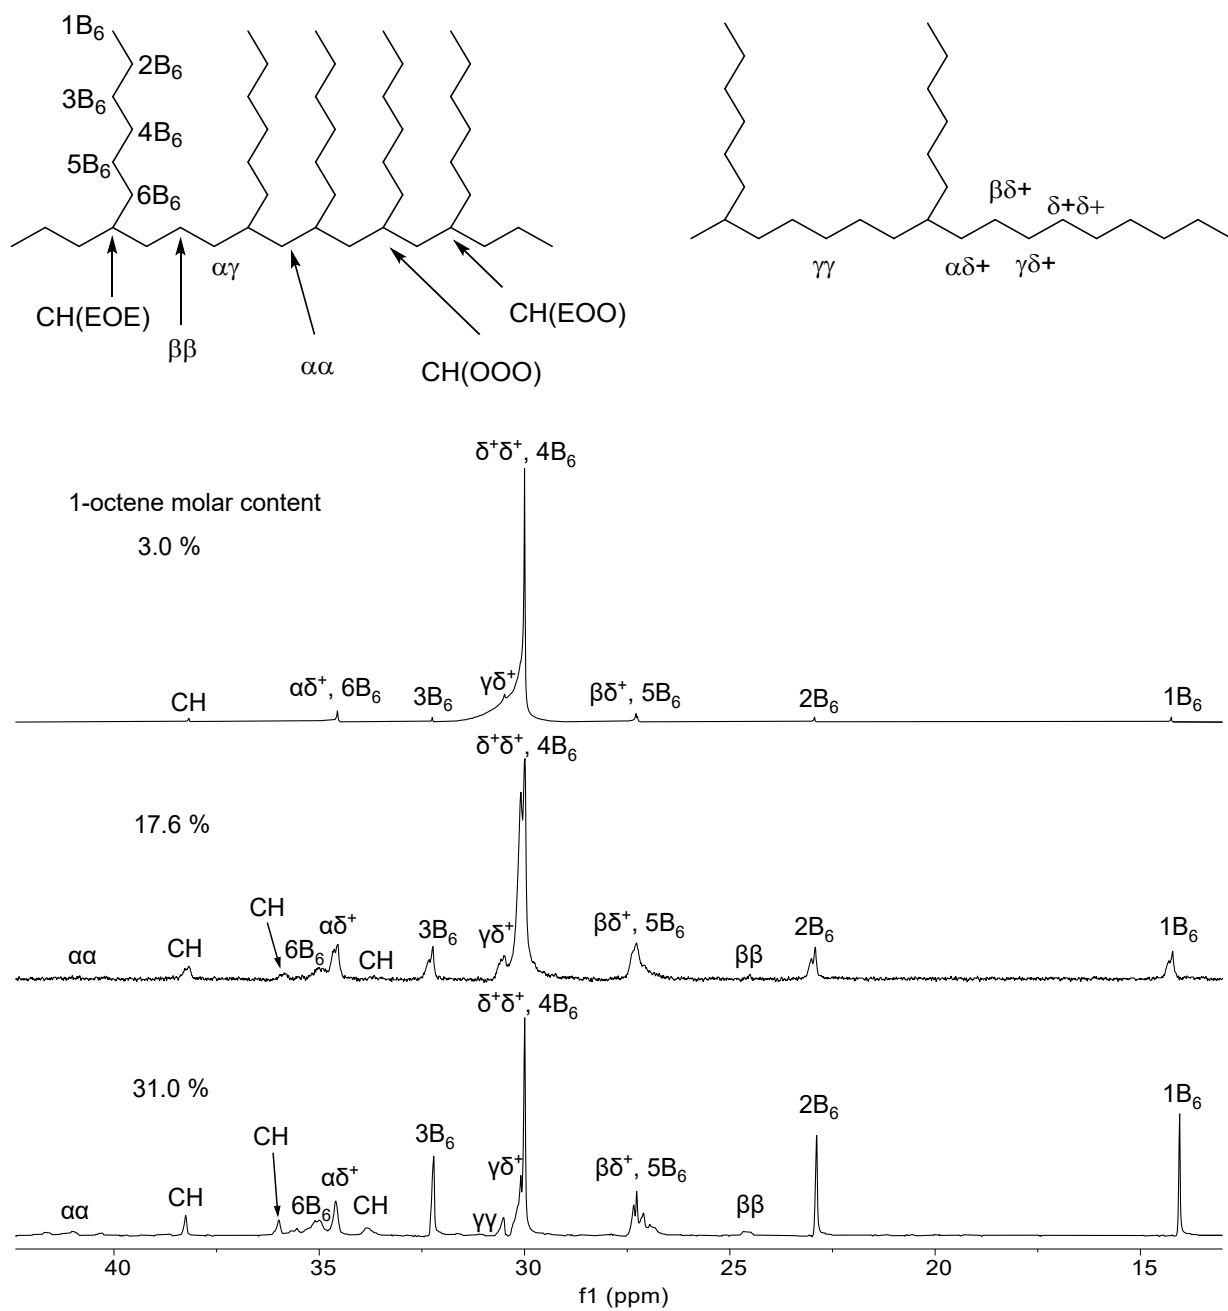

**Fig. S34**  $^{13}\text{C}$ -NMR spectra of 1-octene-ethylene copolymers prepared by **3b**.

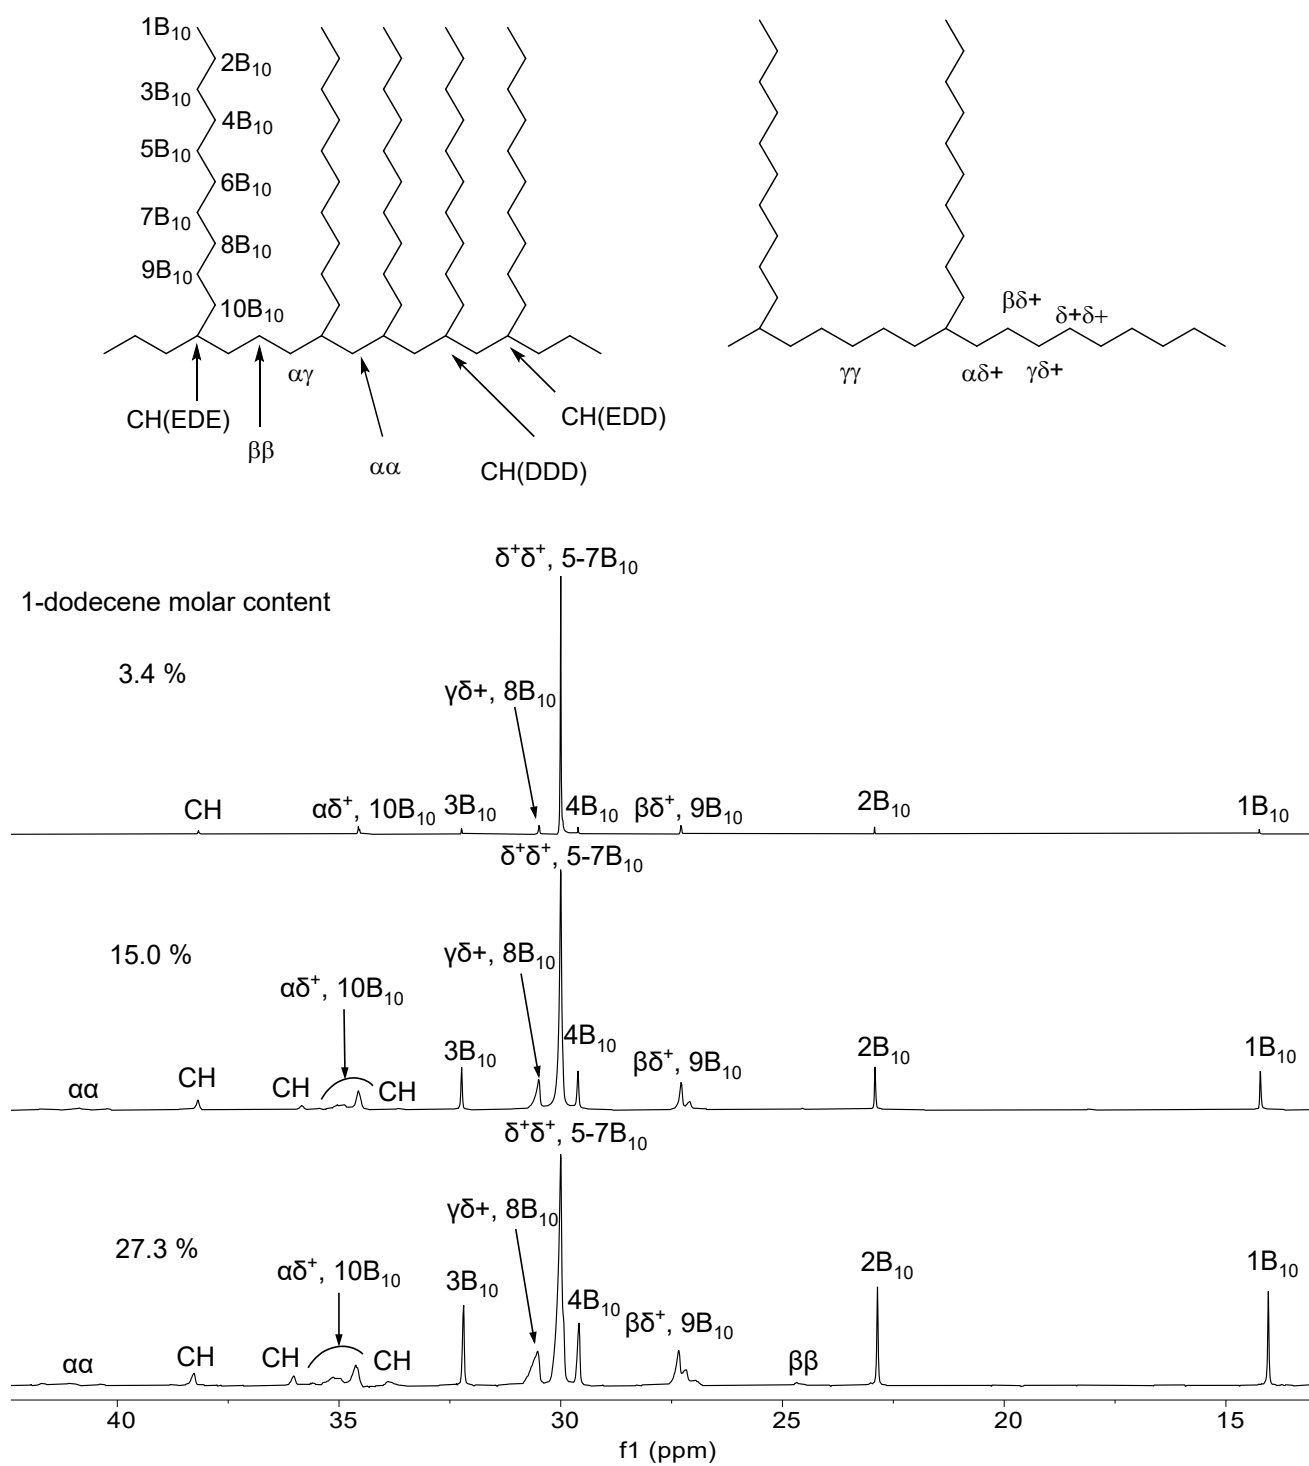

Fig. S35  $^{13}\text{C}$ -NMR spectra of 1-dodecene-ethylene copolymers prepared by **3b**.

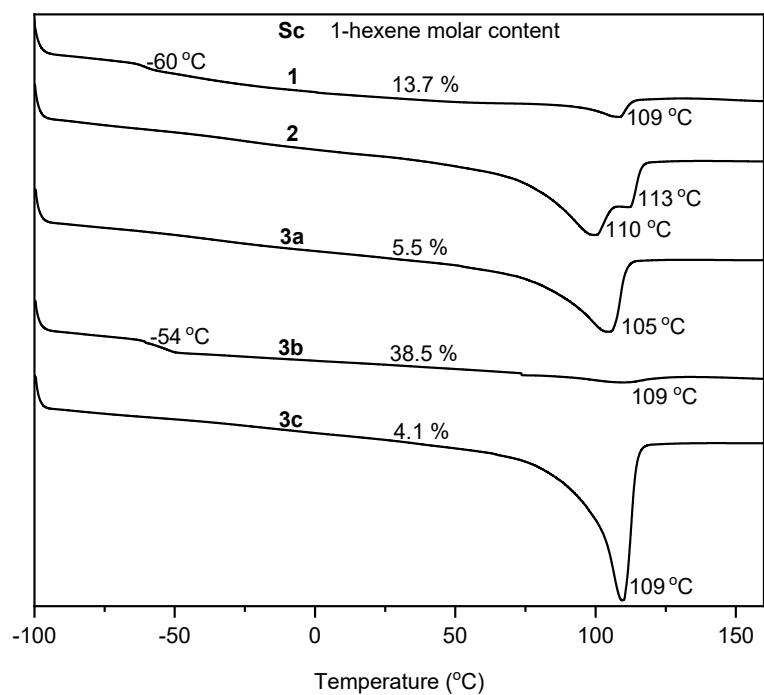

Fig. S36 DSC curves of 1-hexene-ethylene copolymers prepared by **1**, **2**, **3a**, **3b**, **3c**.

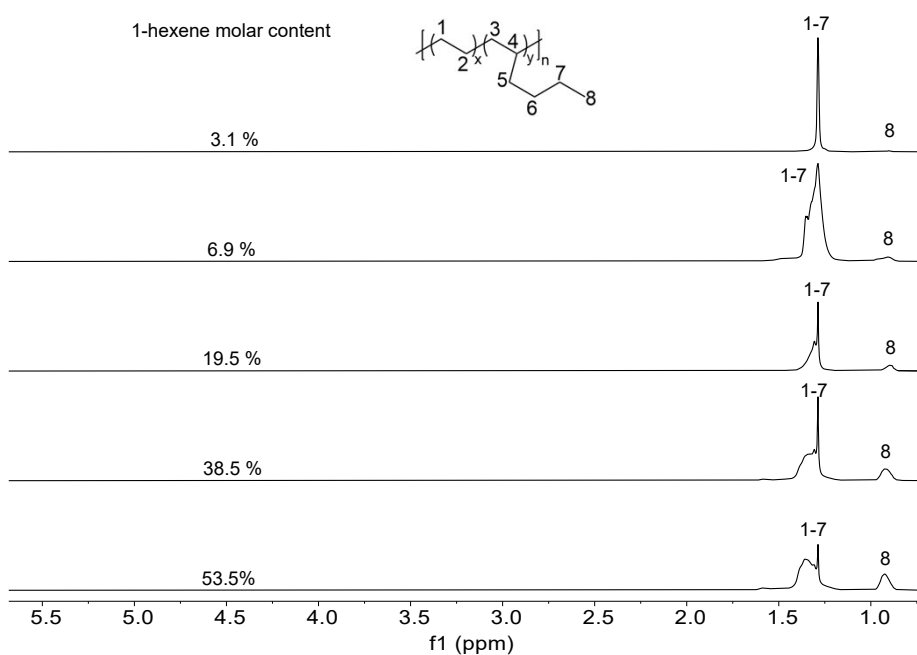

Fig. S37 <sup>1</sup>H-NMR spectra of 1-hexene-ethylene copolymers prepared by **3b** with different 1-hexene content.

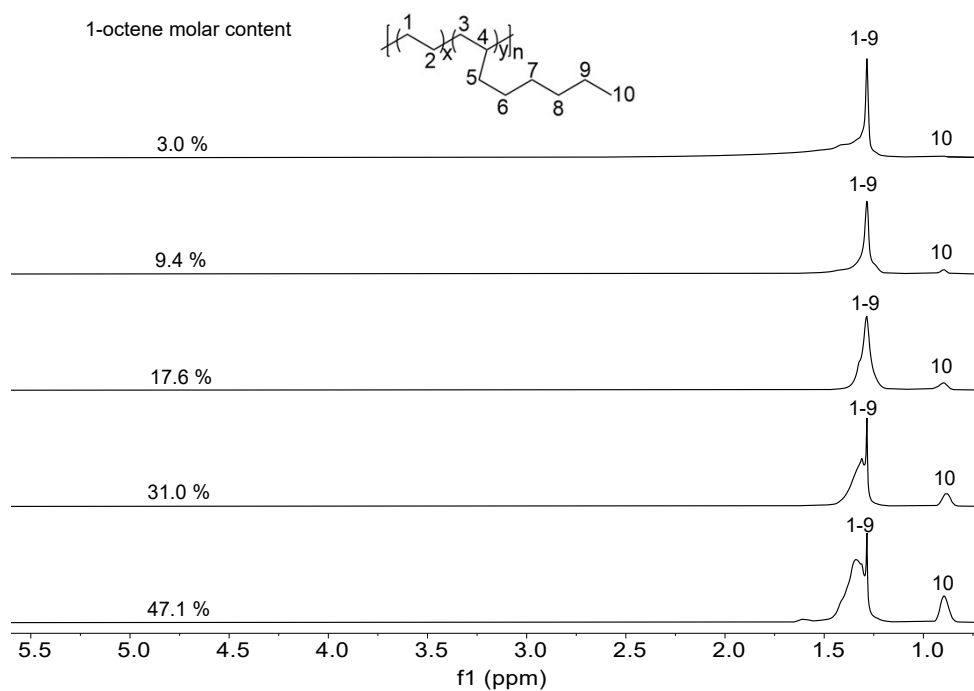

Fig. S38  $^1\text{H-NMR}$  spectra of 1-octene-ethylene copolymers prepared by **3b** with different 1-octene content.

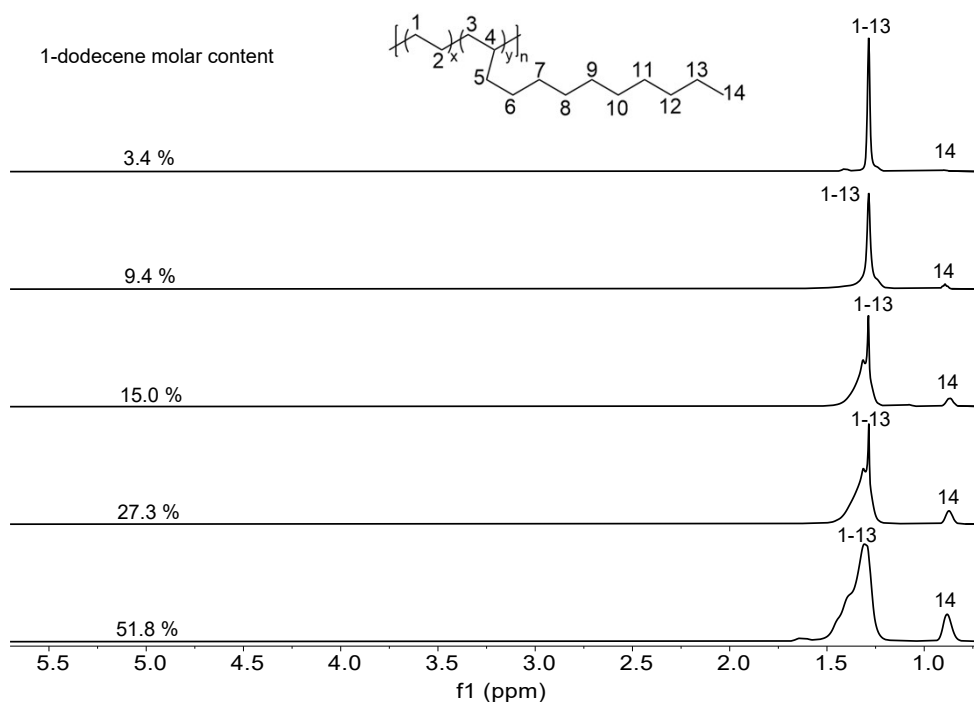

Fig. S39  $^1\text{H-NMR}$  spectra of 1-dodecene-ethylene copolymers prepared by **3b** with different 1-dodecene content.

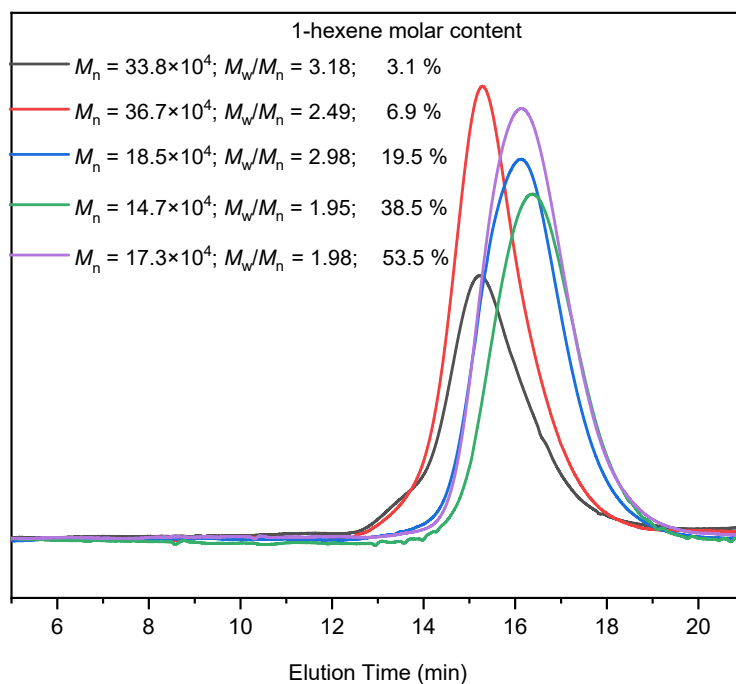

**Fig. S40** GPC curves of 1-hexene-ethylene copolymers prepared by **3b** different 1-hexene content.

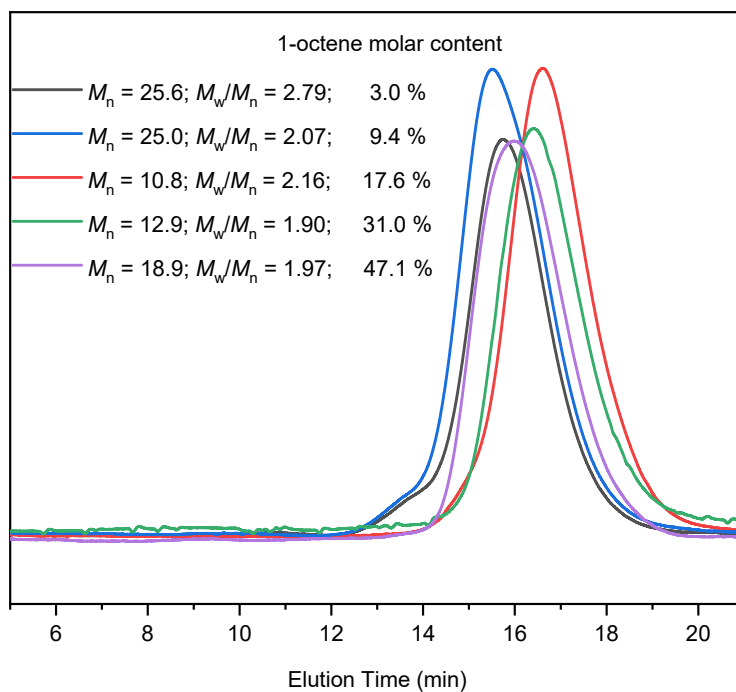

**Fig. S41** GPC curves of 1-octene-ethylene copolymers prepared by **3b** with different 1-octene content.



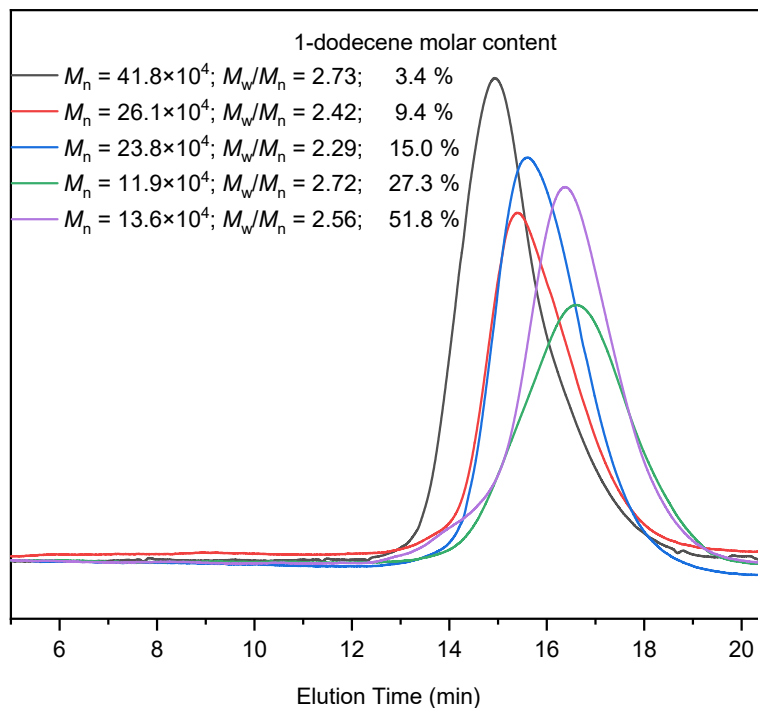

Fig. S42 GPC curves of 1-dodecene-ethylene copolymers prepared by **3b** with different 1-dodecene content.

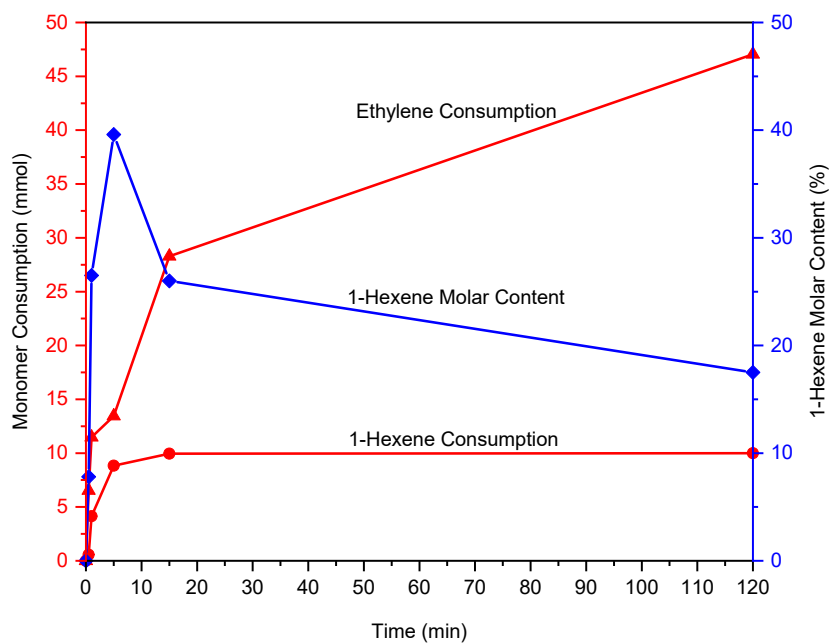

Fig. S43 Plot of ethylene consumption (solid triangle), 1-hexene consumption (solid circle) and 1-hexene molar content (solid diamond) as a function of polymerization time.

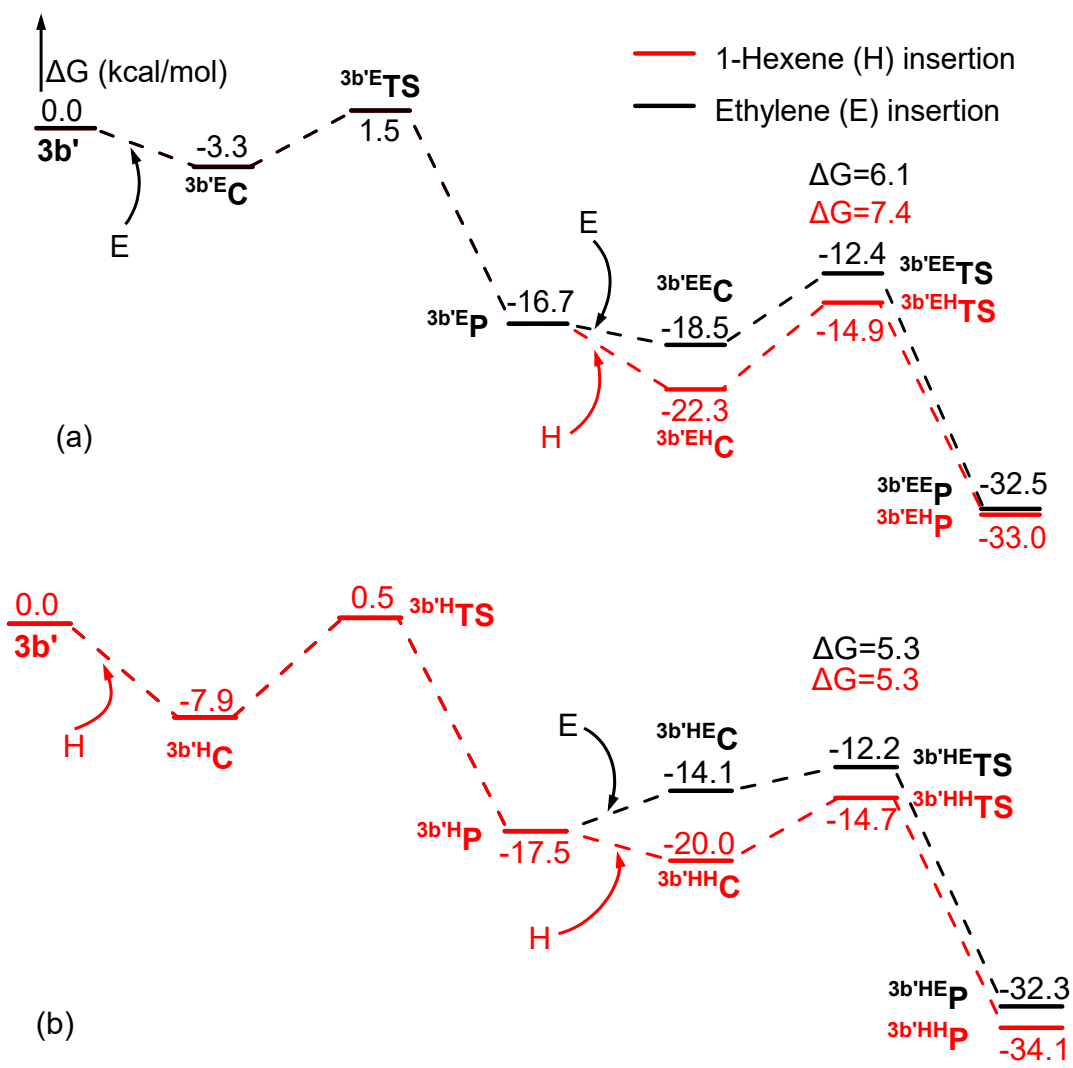

**Fig. S44** Computed energy profiles for 1-hexene or ethylene insertion after an ethylene insertion into Sc-C bond (a) and 1-hexene or ethylene insertion after an 1-hexene insertion into Sc-C bond (b).

**Table S1** Crystal data, data collection and processing parameters for complexes **2**, **3a** and **3b**

|                                         | <b>2</b>            | <b>3a</b>           | <b>3b</b>          |
|-----------------------------------------|---------------------|---------------------|--------------------|
| Formula                                 | C33 H55 N2 Sc Si3   | C31 H47 N2 Sc Si2   | C30 H45 N2 Sc Si2  |
| Mw                                      | 609.02              | 548.84              | 534.82             |
| Crystal system                          | monoclinic          | monoclinic          | tetragonal         |
| Space group                             | P1 <sub>21/n1</sub> | P1 <sub>21/c1</sub> | P-4 <sub>21c</sub> |
| a[Å]                                    | 11.6387(8)          | 10.3315(8)          | 17.6502(16)        |
| b[Å]                                    | 17.0971(12)         | 17.5787(12)         | 17.6502(16)        |
| c[Å]                                    | 19.0816(12)         | 18.0108(13)         | 20.387(3)          |
| α[°]                                    | 90                  | 90                  | 90                 |
| β[°]                                    | 93.598(2)           | 99.520(2)           | 90                 |
| γ[°]                                    | 90                  | 90                  | 90                 |
| V[Å <sup>3</sup> ]                      | 3789.5(4)           | 3226.0(4)           | 6351.2(14)         |
| Z                                       | 4                   | 4                   | 8                  |
| ρ <sub>calcd</sub> [Mg/m <sup>3</sup> ] | 1.067               | 1.130               | 1.119              |
| μ [mm <sup>-1</sup> ]                   | 0.311               | 0.323               | 0.327              |
| F (000)                                 | 1320                | 1184                | 2304               |
| θ range [°]                             | 2.45 to 27.68       | 2.310 to 26.020     | 2.307 to 27.546    |
| no. of reflns collected                 | 55814               | 34148               | 30781              |
| no. of indep reflns                     | 6450                | 4605                | 6518               |
| GOF                                     | 1.187               | 1.037               | 1.267              |
| R [I > 2σ (I)]                          | 0.0858              | 0.0486              | 0.0609             |
| Rw                                      | 0.1517              | 0.1137              | 0.1212             |

**Table S2** Polymerization of 1-hexene by scandium complexes<sup>a</sup>

| Run | Cat.      | 1-hexene (mmol) | T (°C) | t (min) | Yield (%) | Activity <sup>b</sup> | $M_n^c(10^4)$ | $M_w/M_n^c$ |
|-----|-----------|-----------------|--------|---------|-----------|-----------------------|---------------|-------------|
| 1   | <b>1</b>  | 2.5             | -30    | 30      | 99        | 42                    | 11.0          | 1.34        |
| 2   | <b>1</b>  | 5               | -30    | 30      | 93        | 78                    | 17.1          | 1.53        |
| 3   | <b>1</b>  | 10              | -30    | 120     | 95        | 40                    | 23.6          | 1.58        |
| 4   | <b>1</b>  | 15              | -30    | 120     | 97        | 61                    | 25.6          | 1.96        |
| 5   | <b>1</b>  | 20              | -30    | 120     | 95        | 80                    | 26.5          | 1.74        |
| 6   | <b>2</b>  | 2.5             | -30    | 30      | 99        | 42                    | 14.9          | 1.66        |
| 7   | <b>2</b>  | 5               | -30    | 30      | 98        | 82                    | 30.2          | 1.44        |
| 8   | <b>2</b>  | 10              | -30    | 120     | 99        | 42                    | 58.8          | 1.51        |
| 9   | <b>2</b>  | 15              | -30    | 120     | 90        | 89                    | 75.1          | 1.52        |
| 10  | <b>2</b>  | 20              | -30    | 120     | 85        | 71                    | 106.0         | 1.47        |
| 11  | <b>3b</b> | 2.5             | 25     | 5       | 99        | 252                   | 1.7           | 2.11        |
| 12  | <b>3b</b> | 5               | 25     | 5       | 94        | 477                   | 3.8           | 2.12        |
| 13  | <b>3b</b> | 10              | 25     | 5       | 95        | 960                   | 7.8           | 2.14        |
| 14  | <b>3b</b> | 15              | 25     | 30      | 99        | 250                   | 9.2           | 2.23        |
| 15  | <b>3b</b> | 20              | 25     | 30      | 92        | 328                   | 12.4          | 2.12        |
| 16  | <b>3b</b> | 2.5             | -30    | 120     | 99        | 11                    | 9.5           | 1.45        |
| 17  | <b>3b</b> | 5               | -30    | 120     | 97        | 20                    | 17.8          | 1.61        |
| 18  | <b>3b</b> | 10              | -30    | 120     | 94        | 39                    | 34.9          | 1.50        |
| 19  | <b>3b</b> | 15              | -30    | 120     | 91        | 63                    | 39.1          | 1.70        |
| 20  | <b>3b</b> | 20              | -30    | 120     | 90        | 76                    | 40.5          | 1.73        |
| 21  | <b>3c</b> | 2.5             | 25     | 120     | 95        | 10                    | 1.7           | 1.75        |
| 22  | <b>3c</b> | 5               | 25     | 120     | 92        | 19                    | 1.8           | 1.87        |
| 23  | <b>3c</b> | 10              | 25     | 180     | 90        | 25                    | 1.9           | 1.87        |
| 24  | <b>3c</b> | 15              | 25     | 720     | 95        | 10                    | 2.2           | 1.82        |
| 25  | <b>3c</b> | 20              | 25     | 720     | 95        | 13                    | 1.8           | 2.21        |

<sup>a</sup> Condition: [Sc] (10 μmol), [Ph<sub>3</sub>C][B(C<sub>6</sub>F<sub>5</sub>)<sub>4</sub>] (10 μmol), monomer concentration (0.83 mol/L). <sup>b</sup> Given in kg polymer mol<sup>-1</sup><sub>Sc</sub>·h<sup>-1</sup>. <sup>c</sup> Determined by GPC.

**Table S3** Polymerization of ethylene by scandium complexes<sup>a</sup>

| Run | Cat       | T (°C) | Yield (g) | Activity <sup>b</sup> | $M_n^c(10^4)$     | $M_w/M_n^c$ | $T_m^d$ (°C) |
|-----|-----------|--------|-----------|-----------------------|-------------------|-------------|--------------|
| 1   | <b>1</b>  | -30    | 1.18      | 1416                  | 169.6             | 2.61        | 138          |
| 2   | <b>2</b>  | -30    | 0.29      | 348                   | n.d. <sup>e</sup> | n.d.        | 139          |
| 3   | <b>3a</b> | 25     | 0.32      | 384                   | 15.1              | 15.63       | 138          |
| 4   | <b>3b</b> | 25     | 0.95      | 1140                  | 47.2              | 2.51        | 140          |
| 5   | <b>3c</b> | 25     | 0.45      | 540                   | 21.1              | 6.62        | 136          |

<sup>a</sup> Condition: [Sc] (10 μmol), [Ph<sub>3</sub>C][B(C<sub>6</sub>F<sub>5</sub>)<sub>4</sub>] (10 μmol), toluene (30 mL), time (5 min), ethylene (0.1 MPa). <sup>b</sup> Given in kg polymer mol<sup>-1</sup><sub>Sc</sub>·h<sup>-1</sup>. <sup>c</sup> Determined by GPC. <sup>d</sup> Determined by DSC. <sup>e</sup> not determined because of the very low solubility in organic solvents.
